# Supplementary material for: Organocatalytic aldol approach for the protecting group-free asymmetric synthesis of (7R′)-parabenzlactone, (−)-hinokinin, (−)-yatein, (−)-bursehernin, (−)-pluviatolide, (+)-isostegane and allied lignans
Source: Royal Society of Chemistry journal article supplement (doi:10.1039/d3ob01446k), 2023-01-01

# Supplementary Information

## Organocatalytic aldol approach for protecting group-free asymmetric synthesis of (7*R'*)-parabenzlactone, (-)-hinokinin, (-)-yatein, (-)-bursehernin, (-)-pluviatolide, (+)-isostegane and allied lignans

Mainak Bera,<sup>a</sup> Biswajit Sen,<sup>a,b</sup> Sujay Garai,<sup>a,c</sup> and Saumen Hajra<sup>\*,a</sup>

Center of Biomedical Research, Sanjay Gandhi Post-Graduate Institute of Medical Sciences Campus, Raebareli  
Road, Lucknow 226014, India

\*E-mail: saumen.hajra@cbmr.res.in and saumen.hajra@gmail.com; anoop@chem.iitkgp.ac.in

.....

### Contents

|   |                       |          |
|---|-----------------------|----------|
| 1 | Data comparison table | S2 - S7  |
| 2 | References            | S8       |
| 3 | NMR data              | S9 - S32 |

**(7'R)-parabenzlactone (5)**

| Subject          | Munakata group <sup>1</sup><br>(-)-parabenzlactone                                         | Wahälä group <sup>2</sup> (500 MHz, CDCl <sub>3</sub> )<br>(7'S)-parabenzlactone                 | Our work (400 MHz, CDCl <sub>3</sub> )<br>(7'R)-parabenzlactone       |                                                                                                  |
|------------------|--------------------------------------------------------------------------------------------|--------------------------------------------------------------------------------------------------|-----------------------------------------------------------------------|--------------------------------------------------------------------------------------------------|
| <sup>1</sup> H   | Not reported                                                                               | 6.74 (d, <i>J</i> = 8.0 Hz, 1H, ArH)                                                             | 6.74 – 6.70 (m, 1H)                                                   |                                                                                                  |
|                  |                                                                                            | 6.70 (d, <i>J</i> = 1.5 Hz, 1H, ArH)                                                             | 6.68 (d, <i>J</i> = 7.9 Hz, 1H)                                       |                                                                                                  |
|                  |                                                                                            | 6.68 (d, <i>J</i> = 8.0 Hz, 1H, ArH)                                                             | 6.61 (d, <i>J</i> = 7.6 Hz, 2H)                                       |                                                                                                  |
|                  |                                                                                            | 6.67 (dd, <i>J</i> = 1.0, 8.0 Hz, 1H, ArH)                                                       | 6.50 (dd, <i>J</i> = 9.8, 2.0 Hz, 2H),                                |                                                                                                  |
|                  |                                                                                            | 6.61 (d, <i>J</i> = 1.0 Hz, 1H, ArH)                                                             |                                                                       |                                                                                                  |
|                  |                                                                                            | 6.58 (dd, <i>J</i> = 1.5, 8.0 Hz, 1H, ArH)                                                       | 5.97 (d, <i>J</i> = 1.44 Hz, 1H)                                      |                                                                                                  |
|                  |                                                                                            | 5.97 ( <i>J</i> = 1.5 Hz, 1H, OCH <sub>2</sub> O)                                                |                                                                       |                                                                                                  |
|                  |                                                                                            | 5.96 ( <i>J</i> = 1.5 Hz, 1H, OCH <sub>2</sub> O)                                                |                                                                       | 5.95 (d, <i>J</i> = 1.44 Hz, 1H)                                                                 |
|                  |                                                                                            | 5.93 ( <i>J</i> = 1.5 Hz, 1H, OCH <sub>2</sub> O)                                                |                                                                       | 5.93 (d, <i>J</i> = 1.44 Hz, 1H)                                                                 |
|                  |                                                                                            | 5.91 ( <i>J</i> = 1.5 Hz, 1H, OCH <sub>2</sub> O)                                                |                                                                       | 5.92 (d, <i>J</i> = 1.44 Hz, 1H)                                                                 |
|                  |                                                                                            | 4.61 (dd, <i>J</i> = 2.8, 6.2 Hz, 1H, OHCH)                                                      |                                                                       | 4.36 (m, 2H, (HO)CH + OCH)                                                                       |
|                  |                                                                                            | 3.91 (m, 2H, OCH)                                                                                |                                                                       | 4.09 (dd, <i>J</i> = 9.5, 7.8 Hz, 1H, OCH)                                                       |
|                  |                                                                                            | 2.94–3.00 (m, 2H, ArCH)                                                                          |                                                                       | 2.80 (dd, <i>J</i> = 12.9, 4.2 Hz, 1H)                                                           |
|                  |                                                                                            | 2.90 (dd, <i>J</i> = 6.0, 12.0 Hz, 1H, OCH <sub>2</sub> CH)                                      |                                                                       | 2.75 – 2.63 (m, 2H)                                                                              |
|                  |                                                                                            |                                                                                                  |                                                                       | 2.54–2.60 (m, 1H, O=CCH)                                                                         |
|                  |                                                                                            | <sup>13</sup> C NMR (CDCl <sub>3</sub> , 125 MHz)                                                |                                                                       | <sup>13</sup> C NMR (CDCl <sub>3</sub> , 101 MHz)                                                |
| <sup>13</sup> C  | Not reported                                                                               | 178.9                                                                                            |                                                                       | 178.7                                                                                            |
|                  |                                                                                            | 148.1, 147.6, 147.5, 146.3, 135.3, 131.2, 122.7, 119.4, 109.9, 108.2, 108.1, 106.2, 101.3, 100.9 |                                                                       | 148.0, 147.8, 147.5, 146.4, 135.4, 131.1, 122.2, 119.4, 116.1, 109.3, 108.2, 106.1, 101.2, 101.0 |
|                  |                                                                                            | 75.5                                                                                             |                                                                       | 73.7                                                                                             |
|                  |                                                                                            | 68.4                                                                                             |                                                                       | 67.9                                                                                             |
|                  |                                                                                            | 45.1                                                                                             | 46.3                                                                  |                                                                                                  |
|                  |                                                                                            | 43.7                                                                                             | 43.5                                                                  |                                                                                                  |
|                  |                                                                                            | 35.1                                                                                             | 35                                                                    |                                                                                                  |
| Optical rotation | [α] <sub>D</sub> <sup>25</sup> = -11.0 (c = 1.15, CHCl <sub>3</sub> ), (-)-parabenzlactone | [α] <sub>D</sub> <sup>22</sup> = -15.0 (c = 0.3, CHCl <sub>3</sub> ), (7'S)-parabenzlactone      | [α] <sub>D</sub> <sup>25</sup> = +25.9 (c = 0.42, CHCl <sub>3</sub> ) |                                                                                                  |
| State/M. P.      | 159–161 °C                                                                                 | 155–158 °C                                                                                       | sticky colourless oil                                                 |                                                                                                  |

(-)- Hinokinin (6)

| subject                | Belletire group <sup>3</sup> (Frequency not provided)           | Present study ( <sup>1</sup> H NMR (400 MHz, CDCl <sub>3</sub> )) |
|------------------------|-----------------------------------------------------------------|-------------------------------------------------------------------|
| <sup>1</sup> H         | 6.75-6.66 (m, 2 H, ArH)                                         | 6.73 (d, <i>J</i> = 7.84 Hz, 1H)                                  |
|                        |                                                                 | 6.70 (d, <i>J</i> = 8.28 Hz, 1H)                                  |
|                        | 6.65-6.56 (m, 2 H, ArH)                                         | 6.63 (d, <i>J</i> = 1.7 Hz, 1H)                                   |
|                        |                                                                 | 6.60 (dd, <i>J</i> = 7.8, 1.7 Hz, 1H)                             |
|                        | 6.50-6.42 (m, 2 H, ArH)                                         | 6.46 (m, 2H)                                                      |
|                        | 5.925 (br s, 4 H, OCH <sub>2</sub> O)                           | 5.93 (m, 4H)                                                      |
|                        | 4.118 (dd, <i>J</i> = 6.9, 9.1 Hz, 1 H, CHHOC=O)                | 4.13 (dd, <i>J</i> = 9.24, 6.84 Hz, 1H)                           |
|                        | 3.850 (dd, <i>J</i> = 6.9, 9.1 Hz, 1 H, CHHOC=O)                | 3.86 (dd, <i>J</i> = 9.2, 6.92 Hz, 1H)                            |
|                        | 2.978 (dd, <i>J</i> = 4.9, 13.9 Hz, 1 H, CHHCHCO <sub>2</sub> ) | 2.99 (dd, <i>J</i> = 14.1, 5.0 Hz, 1H)                            |
|                        | 2.826 (dd, <i>J</i> = 4.9, 13.9 Hz, 1 H, CHHCHCO <sub>2</sub> ) | 2.84 (dd, <i>J</i> = 14.1, 7.2 Hz, 1H)                            |
| 2.64-2.39 (m, 4 H, CH) | 2.61 – 2.51 (m, 2H)                                             |                                                                   |
|                        | 2.49- 2.42 (m, 2H)                                              |                                                                   |
|                        | <b>(Frequency not provided)</b>                                 | <b><sup>13</sup>C NMR (101 MHz, CDCl<sub>3</sub>)</b>             |
| <sup>13</sup> C        | 178.391 (s)                                                     | 178.4                                                             |
|                        | 147.847 (s)                                                     | 147.9                                                             |
|                        | 146.441 (s)                                                     | 146.5                                                             |
|                        | 146.309 (s)                                                     | 146.4                                                             |
|                        | 131.652 (s)                                                     | 131.6                                                             |
|                        | 131.396 (s)                                                     | 131.3                                                             |
|                        | 122.205 (d)                                                     | 122.2                                                             |
|                        | 121.525 (d)                                                     | 121.5                                                             |
|                        | 109.424 (d)                                                     | 109.4                                                             |
|                        | 108.810 (d)                                                     | 108.8                                                             |
|                        | 108.293 (d)                                                     | 108.4                                                             |
|                        | 108.277 (d)                                                     | 108.3                                                             |
|                        | 101.007 (t)                                                     | 101.0                                                             |
|                        | 71.101 (t)                                                      | 71.1                                                              |
|                        | 46.427 (d)                                                      | 46.5                                                              |
|                        | 41.252 (d)                                                      | 41.3                                                              |
|                        | 38.274 (t)                                                      | 38.4                                                              |
| 34.777 (t)             | 34.8                                                            |                                                                   |

|                         | Woodcock group <sup>4</sup>                               | Magnusson group <sup>5</sup>                            | Present Study                                           |
|-------------------------|-----------------------------------------------------------|---------------------------------------------------------|---------------------------------------------------------|
| <b>Optical rotation</b> | $[\alpha]_D^{17} = -34.0$ (c = 0.981, CHCl <sub>3</sub> ) | $[\alpha]_D^{23} = -34.7$ (c = 0.7, CHCl <sub>3</sub> ) | $[\alpha]_D^{25} = -33.0$ (c = 1.0, CHCl <sub>3</sub> ) |
| <b>State/M.P.</b>       | 65-66 °C                                                  | Colourless viscous oil                                  | Colourless viscous oil                                  |

**(-)-Yatein (8)**

| subject                 | Chen group <sup>6</sup>                                             | Enders group <sup>7</sup> ( <sup>1</sup> H NMR (300 MHz, CDCl <sub>3</sub> )) [(+) - Yatein] | Our work ( <sup>1</sup> H NMR (400 MHz, CDCl <sub>3</sub> ))                |
|-------------------------|---------------------------------------------------------------------|----------------------------------------------------------------------------------------------|-----------------------------------------------------------------------------|
| <sup>1</sup> H          | Not provided                                                        | 6.69 (dd, 1 H, <i>J</i> = 1.0, 6.9 Hz, ArH)                                                  | 6.69 (dd, <i>J</i> = 7.32, 0.96 Hz, 1H)                                     |
|                         |                                                                     | 6.49-6.46 (m, 2 H, ArH)                                                                      | 6.48 (dd, <i>J</i> = 8.24, 1.76 Hz, 1H)                                     |
|                         |                                                                     | 6.36 (s, 2 H, ArH)                                                                           | 6.45 (s, 1H)                                                                |
|                         |                                                                     | 5.94 (dd, 2 H, <i>J</i> = 1.4, 3 Hz, OCH <sub>2</sub> O)                                     | 6.36 (s, 2H)                                                                |
|                         |                                                                     | 4.18 (dd, 1 H, <i>J</i> = 7.2, 9.3 Hz, CHHOC=O)                                              | 5.94 (d, <i>J</i> = 1.44 Hz, 1H)                                            |
|                         |                                                                     | 3.88 (dd, 1 H, <i>J</i> = 7.4, 9.0 Hz, CHHOC=O)                                              | 5.93 (d, <i>J</i> = 1.44 Hz, 1H)                                            |
|                         |                                                                     | 3.83 (s, 9H, OCH <sub>3</sub> )                                                              | 4.18 (dd, <i>J</i> = 9.2, 7.1 Hz, 1H)                                       |
|                         |                                                                     | 3.06 (m, 1H, CHHCHCO <sub>2</sub> )                                                          | 3.88 (dd, <i>J</i> = 9.1, 7.4 Hz, 1H)                                       |
|                         |                                                                     | 2.94 - 2.88 (m, 1H, CH)                                                                      | 3.83 (s, 9H)                                                                |
|                         |                                                                     | 2.64 - 2.46 (m, 4H, CH <sub>2</sub> )                                                        | 2.96-2.86 (m, 2H)                                                           |
|                         |                                                                     | <sup>13</sup> C NMR (75 MHz, CDCl <sub>3</sub> )                                             | <sup>13</sup> C NMR (101 MHz, CDCl <sub>3</sub> )                           |
| <sup>13</sup> C         | Not provided                                                        | 178.56                                                                                       | 178.5                                                                       |
|                         |                                                                     | 153.24, 147.92, 146.40, 136.80, 133.34, 131.53, 121.54, 108.77, 108.31, 106.16, 101.10       | 153.3, 147.9, 146.4, 136.9, 133.3, 131.5, 121.5, 108.8, 108.3, 106.2, 101.1 |
|                         |                                                                     | 71.20                                                                                        | 71.2                                                                        |
|                         |                                                                     | 60.88                                                                                        | 60.9                                                                        |
|                         |                                                                     | 56.09                                                                                        | 56.1                                                                        |
|                         |                                                                     | 46.44                                                                                        | 46.5                                                                        |
|                         |                                                                     | 41.01                                                                                        | 41.0                                                                        |
|                         |                                                                     | 38.33                                                                                        | 38.4                                                                        |
|                         |                                                                     | 35.23                                                                                        | 35.3                                                                        |
| <b>Optical rotation</b> | [α] <sub>D</sub> <sup>22</sup> = -30.0 (c 0.15, CHCl <sub>3</sub> ) | [α] <sub>D</sub> <sup>22</sup> = +30.6 (c = 1.10, CHCl <sub>3</sub> )<br>For (+) - Yatein    | [α] <sub>D</sub> <sup>25</sup> = -26.5 (c = 0.4, CHCl <sub>3</sub> )        |
| <b>State/M.P.</b>       | Not provided                                                        | Colourless oil                                                                               | Yellowish gummy liquid                                                      |

**(+)- Isostagane (4)**

| Subject                 | Tomioka group <sup>8</sup>                                                  | Enders group <sup>7</sup> ( <sup>1</sup> H NMR (400 MHz, CDCl <sub>3</sub> )) [ (-)- Isostagane] | Present study ( <sup>1</sup> H NMR (400 MHz, CDCl <sub>3</sub> ))                  |
|-------------------------|-----------------------------------------------------------------------------|--------------------------------------------------------------------------------------------------|------------------------------------------------------------------------------------|
| <sup>1</sup> H          | 6.3-6.7 (m, 3H)                                                             | 6.63 (s, 1H, ArH)                                                                                | 6.70 (s, 1H)                                                                       |
|                         |                                                                             | 6.56 (s, 1 H, ArH)                                                                               | 6.623 (s,1H)                                                                       |
|                         |                                                                             | 6.55 (s, 1 H, ArH)                                                                               | 6.618 (s,1H)                                                                       |
|                         | 5.45 (d, 1H, J = 1 Hz)                                                      | 5.93 (d, 1 H, J = 1.3 Hz, OCHHO)                                                                 | 6.01 (d, J = 1.5, 1H),                                                             |
|                         | 5.39 (d, 1H, J = 1 Hz)                                                      | 5.90 (d, 1 H, J = 1.3 Hz, OCHHO)                                                                 | 5.98 (d, J = 1.5, 1H)                                                              |
|                         | 3.81 (s, 3H), 3.47 (s, 3H), 3.38 (s, 3H), 2.8-3.9 (m, 3H), 1.3-2.2 (m, 5H), | 4.29 (dd, 1 H, J = 6.6, 8.2 Hz, CHHOC=O)                                                         | 4.37 (dd, J = 8.5, 6.5 Hz, 1H),                                                    |
|                         |                                                                             | 3.82 (s, 3 H, OCH <sub>3</sub> )                                                                 | 3.90 (s, 3H)                                                                       |
|                         |                                                                             | 3.81 (s, 3 H, OCH <sub>3</sub> )                                                                 | 3.88 (s, 3H)                                                                       |
|                         |                                                                             | 3.70 (dd, 1 H, J = 8.5, 11.0 Hz, CHHOC=O)                                                        | 3.77 (dd, J = 11.1, 8.5 Hz, 1H)                                                    |
|                         |                                                                             | 3.50 (s, 3 H, OCH <sub>3</sub> )                                                                 | 3.57 (s, 3H)                                                                       |
|                         |                                                                             | 3.06 (d, 1, H, J = 13.2 Hz, CHHCH <sub>2</sub> CO <sub>2</sub> )                                 | 3.12 (d, J = 13.4 Hz, 1H)                                                          |
|                         |                                                                             | 2.57 (d, 1 H, J = 12.9 Hz, CHHCH <sub>2</sub> CO <sub>2</sub> )                                  | 2.63 (d, J = 13.1 Hz, 1H)                                                          |
|                         |                                                                             | 2.32 (dd, 1 H, J = 9.6, 13.2 Hz, CHHCHCO <sub>2</sub> )                                          | 2.39 (dd, J = 13.1, 9.5 Hz, 1H)                                                    |
|                         |                                                                             | 2.22 (dd, 1 H, J = 9.3, 13.6 Hz, CHHCHCO <sub>2</sub> )                                          | 2.29 (dd, J = 13.4, 9.2 Hz, 1H)                                                    |
|                         |                                                                             | 2.17-2.00 (m, 2 H, CH)                                                                           | 2.12-2.07 (m, 2H)                                                                  |
|                         | <sup>13</sup> C NMR (75 MHz, CDCl <sub>3</sub> )                            | <sup>13</sup> C NMR (200 MHz, CDCl <sub>3</sub> )                                                |                                                                                    |
| <sup>13</sup> C         | Not provided                                                                | 32.55                                                                                            | 32.3                                                                               |
|                         |                                                                             | 34.39                                                                                            | 34.1                                                                               |
|                         |                                                                             | 47.27                                                                                            | 47.0                                                                               |
|                         |                                                                             | 50.33                                                                                            | 50.1                                                                               |
|                         |                                                                             | 56.30                                                                                            | 56.0                                                                               |
|                         |                                                                             | 61.07                                                                                            | 60.8                                                                               |
|                         |                                                                             | 61.23                                                                                            | 61.0                                                                               |
|                         |                                                                             | 70.31                                                                                            | 70.1                                                                               |
|                         |                                                                             | 101.46                                                                                           | 101.2                                                                              |
|                         |                                                                             | 107.74, 109.05, 112.02,126.70, 128.58, 132.74, 136.33, 146.16, 147.93, 152.14, 153.60            | 107.5, 108.8, 111.8, 126.4, 128.3, 132.4, 136.1, 140.8, 145.9, 147.7, 151.9, 153.4 |
| 176.83                  | 176.6                                                                       |                                                                                                  |                                                                                    |
| <b>Optical rotation</b> | [α] <sub>D</sub> <sup>20</sup> = +154.0 (c = 0.7, CHCl <sub>3</sub> )       | [α] <sub>D</sub> <sup>22</sup> = -156.9 (c = 2.8, CHCl <sub>3</sub> )                            | [α] <sub>D</sub> <sup>25</sup> = +151.0 (c = 0.6, CHCl <sub>3</sub> )              |
| <b>State/M.P.</b>       | Not provided                                                                | 171-172 °C                                                                                       | Yellow oil                                                                         |

**(-)-Brusehernin (10)**

| subject                 | Macmillan group <sup>9</sup> ( <sup>1</sup> H NMR (500 MHz, CDCl <sub>3</sub> ))             | Our work ( <sup>1</sup> H NMR (400 MHz, CDCl <sub>3</sub> ))                              |
|-------------------------|----------------------------------------------------------------------------------------------|-------------------------------------------------------------------------------------------|
| <sup>1</sup> H          | 6.80 (d, <i>J</i> = 8.1 Hz, 1H, ArH)                                                         | 6.79 (d, <i>J</i> = 8.0 Hz, 1H)                                                           |
|                         | 6.70 (d, <i>J</i> = 7.9 Hz, 2H, ArH),                                                        | 6.69 (d, <i>J</i> = 7.7 Hz, 2H)                                                           |
|                         | 6.67 (d, <i>J</i> = 1.9 Hz, 1H, ArH)                                                         | 6.66 (d, <i>J</i> = 2.0 Hz, 1H)                                                           |
|                         | 6.47 (dd, <i>J</i> = 7.7, 1.7 Hz, 1H, ArH)                                                   | 6.46 (dd, <i>J</i> = 7.8, 1.8 Hz, 1H),                                                    |
|                         | 6.44 (d, <i>J</i> = 1.6 Hz, 1H, ArH)                                                         | 6.43 (d, <i>J</i> = 1.7 Hz, 1H)                                                           |
|                         | 5.94 (s, 1H, OCH <sub>2</sub> O)                                                             | 5.94 (d, <i>J</i> = 1.44 Hz, 1H)                                                          |
|                         | 5.93 (s, 1H, OCH <sub>2</sub> O)                                                             | 5.93 (d, <i>J</i> = 1.44 Hz, 1H)                                                          |
|                         | 4.13 (dd, <i>J</i> = 9.2, 6.7 Hz, 1H, OCH)                                                   | 4.12 (dd, <i>J</i> = 9.1, 6.8 Hz, 1H)                                                     |
|                         | 3.87 (s, 3H, OCH <sub>3</sub> )                                                              | 3.87 (s, 3H)                                                                              |
|                         | 3.85 (s, 3H, OCH <sub>3</sub> )                                                              | 3.84 (s, 3H)                                                                              |
|                         | 3.86-3.82 (m, 1H, OCH)                                                                       | 3.89-3.84 (m, 1H)                                                                         |
|                         | 2.98 (dd, <i>J</i> = 14.1, 5.1 Hz, 1H, ArCH)                                                 | 2.97 (dd, <i>J</i> = 14.0, 5.1 Hz, 1H)                                                    |
|                         | 2.90 (dd, <i>J</i> = 14.1, 7.0 Hz, 1H, ArCH)                                                 | 2.89 (dd, <i>J</i> = 14.0, 7.0 Hz, 1H)                                                    |
|                         | 2.64-2.54 (m, 2H, ArCH + OCH <sub>2</sub> CH)                                                | 2.62 – 2.53 (m, 2H)                                                                       |
|                         | 2.52-2.44 (m, 2H, ArCH + O=CCH)                                                              | 2.5 – 2.45 (m, 2H)                                                                        |
|                         | <sup>13</sup> C NMR (CDCl <sub>3</sub> , 125 MHz)                                            | <sup>13</sup> C NMR (101 MHz, CDCl <sub>3</sub> )                                         |
| <sup>13</sup> C         | 178.8                                                                                        | 178.7                                                                                     |
|                         | 149.2, 148.04, 148.00, 146.5, 131.7, 130.2, 121.7, 121.5, 112.2, 111.2, 108.9, 108.4, 101.2, | 149.0, 147.9, 147.6, 146.3, 131.6, 130.1, 121.5, 121.3, 112.0, 111.0, 108.7, 108.3, 101.1 |
|                         | 71.3                                                                                         | 71.2                                                                                      |
|                         | 56.0                                                                                         | 55.8                                                                                      |
|                         | 55.9                                                                                         | 55.8                                                                                      |
|                         | 46.7                                                                                         | 46.5                                                                                      |
|                         | 41.2                                                                                         | 41.0                                                                                      |
|                         | 38.5                                                                                         | 38.3                                                                                      |
|                         | 34.8                                                                                         | 34.6                                                                                      |
| <b>Optical rotation</b> | [α] <sub>D</sub> = -19.2 (c = 1.0, CHCl <sub>3</sub> )                                       | [α] <sub>D</sub> <sup>25</sup> = -20.4 (c = 0.4 CHCl <sub>3</sub> )                       |
| <b>Melting point</b>    | Colourless oil                                                                               | colourless oil                                                                            |

**(-)-Pluviatolide (12):**

| <b>Subject</b>          | <b>Feringa group<sup>10</sup> (Frequency not provided)</b>                                     | <b>Our work (<sup>1</sup>H NMR (400 MHz, CDCl<sub>3</sub>))</b>                            |
|-------------------------|------------------------------------------------------------------------------------------------|--------------------------------------------------------------------------------------------|
| <b><sup>1</sup>H</b>    | 6.86-6.82 (m, 1H, ArH)                                                                         | 6.84 (d, <i>J</i> = 8.0 Hz, 1H)                                                            |
|                         | 6.72-6.60 (m, 3H, ArH)                                                                         | 6.69 (d, <i>J</i> = 8.3, 1H)                                                               |
|                         |                                                                                                | 6.66 (d, <i>J</i> = 2.0 Hz, 1H)                                                            |
|                         |                                                                                                | 6.63 (dd, <i>J</i> = 8.0, 2.0 Hz, 1H)                                                      |
|                         | 6.48-6.45 (m, 2H, ArH)                                                                         | 6.45 (dd, <i>J</i> = 8.0, 1.76 Hz, 1H)                                                     |
|                         |                                                                                                | 6.44 (s, 1H)                                                                               |
|                         | 5.93 (s, 2H, OCH <sub>2</sub> O)                                                               | 5.93 (d, <i>J</i> = 1.24 Hz, 2H)                                                           |
|                         | 5.65 (bs, 1H, OH)                                                                              | 5.52 (br s, 1H)                                                                            |
|                         | 4.16-4.08 (m, 1H, OCH)                                                                         | 4.11 (dd, <i>J</i> = 9.1, 6.9 Hz, 1H)                                                      |
|                         | 3.90-3.82 (m, 1H, OCH)                                                                         | 3.88-3.82 (m, 1H)                                                                          |
|                         | 3.85 (s, 3H, OCH <sub>3</sub> )                                                                | 3.85 (s, 3H)                                                                               |
|                         | 3.02-2.82 (m, 2H, ArCH)                                                                        | 2.96 (dd, <i>J</i> = 14.1, 5.1 Hz, 1H)                                                     |
|                         |                                                                                                | 2.89 (dd, <i>J</i> = 14.1, 6.7 Hz, 1H)                                                     |
|                         | 2.63- 2.43 (m, 4H, ArCH + OCH <sub>2</sub> CH + O=CCH)                                         | 2.65 – 2.53 (m, 2H)                                                                        |
| 2.51-2.42 (m, 2H)       |                                                                                                |                                                                                            |
|                         | <b>Not provided</b>                                                                            | <b><sup>13</sup>C NMR (101 MHz, CDCl<sub>3</sub>)</b>                                      |
| <b><sup>13</sup>C</b>   | 178.76                                                                                         | 178.7                                                                                      |
|                         | 147.82,146.69,146.28,144.52, 131.62, 129.43,122.04,121.54,114.29,111.57, 108.80,108.28, 101.02 | 147.9, 146.7, 146.3, 144.5, 131.6, 129.4, 122.1, 121.6, 114.2, 111.5, 108.8, 108.3, 101.0, |
|                         | 71.21                                                                                          | 71.2                                                                                       |
|                         | 55.88                                                                                          | 55.9                                                                                       |
|                         | 46.57                                                                                          | 46.6                                                                                       |
|                         | 41.0                                                                                           | 41.0                                                                                       |
|                         | 38.24                                                                                          | 38.3                                                                                       |
|                         | 34.6                                                                                           | 34.6                                                                                       |
| <b>Optical rotation</b> | $[\alpha]_D^{23} = -30.1$ (c = 0.93, CHCl <sub>3</sub> )                                       | $[\alpha]_D^{25} = -29.0$ (c = 1.0, CHCl <sub>3</sub> )                                    |
| <b>State/ M. P.</b>     | 158-159 °C                                                                                     | Colourless Gummy oil                                                                       |

## References

- 1 K. Wada, K. Munakata, *Tetrahedron Lett.* 1970, **11**, 2017-2019
- 2 B. Raffaelli, K. Wähälä, T. Hase, *Org. Biomol. Chem.* 2006, **4**, 331–341.
- 3 J. L. Belletire, D. F. Fry, *J. Org. Chem.* 1987, **52**, 2549.
- 4 R. D. Haworth, D. Woodcock, *J. Chem. Soc.* 1938, 1985-1989.
- 5 N. Rehnberg, G. Magnusson, *J. Org. Chem.* 1990, **55**, 4340-4349.
- 6 J. -J. Chen, T. Ishikawa, C. -Y. Duh, I. -L. Tsai, I. -S. Chen, *Planta Med.* 1996, **62**, 528–533.
- 7 D. Enders, V. Lausberg, G. D. Signore, O. M. A. Berner, *Synthesis* 2002, **4**, 515-522
- 8 K. Tomioka, T. Ishiguro, Y. Iitaka, K. Koga, *Tetrahedron* 1984, **40**, 1303–1312
- 9 E. R. Welin, A. A. Warkentin, J. C. Conrad, D. W. C. MacMillan, *Angew. Chem. Int. Ed.* 2015, **54**, 9668–9672.
- 10 A. V. Oeveren, J. F. G. A. Jansen, B. L. Feringa, *J. Org. Chem.* 1994, **59**, 5999 – 6007



**<sup>1</sup>H NMR of lactone 13b (400 MHz, CDCl<sub>3</sub>)**

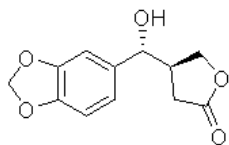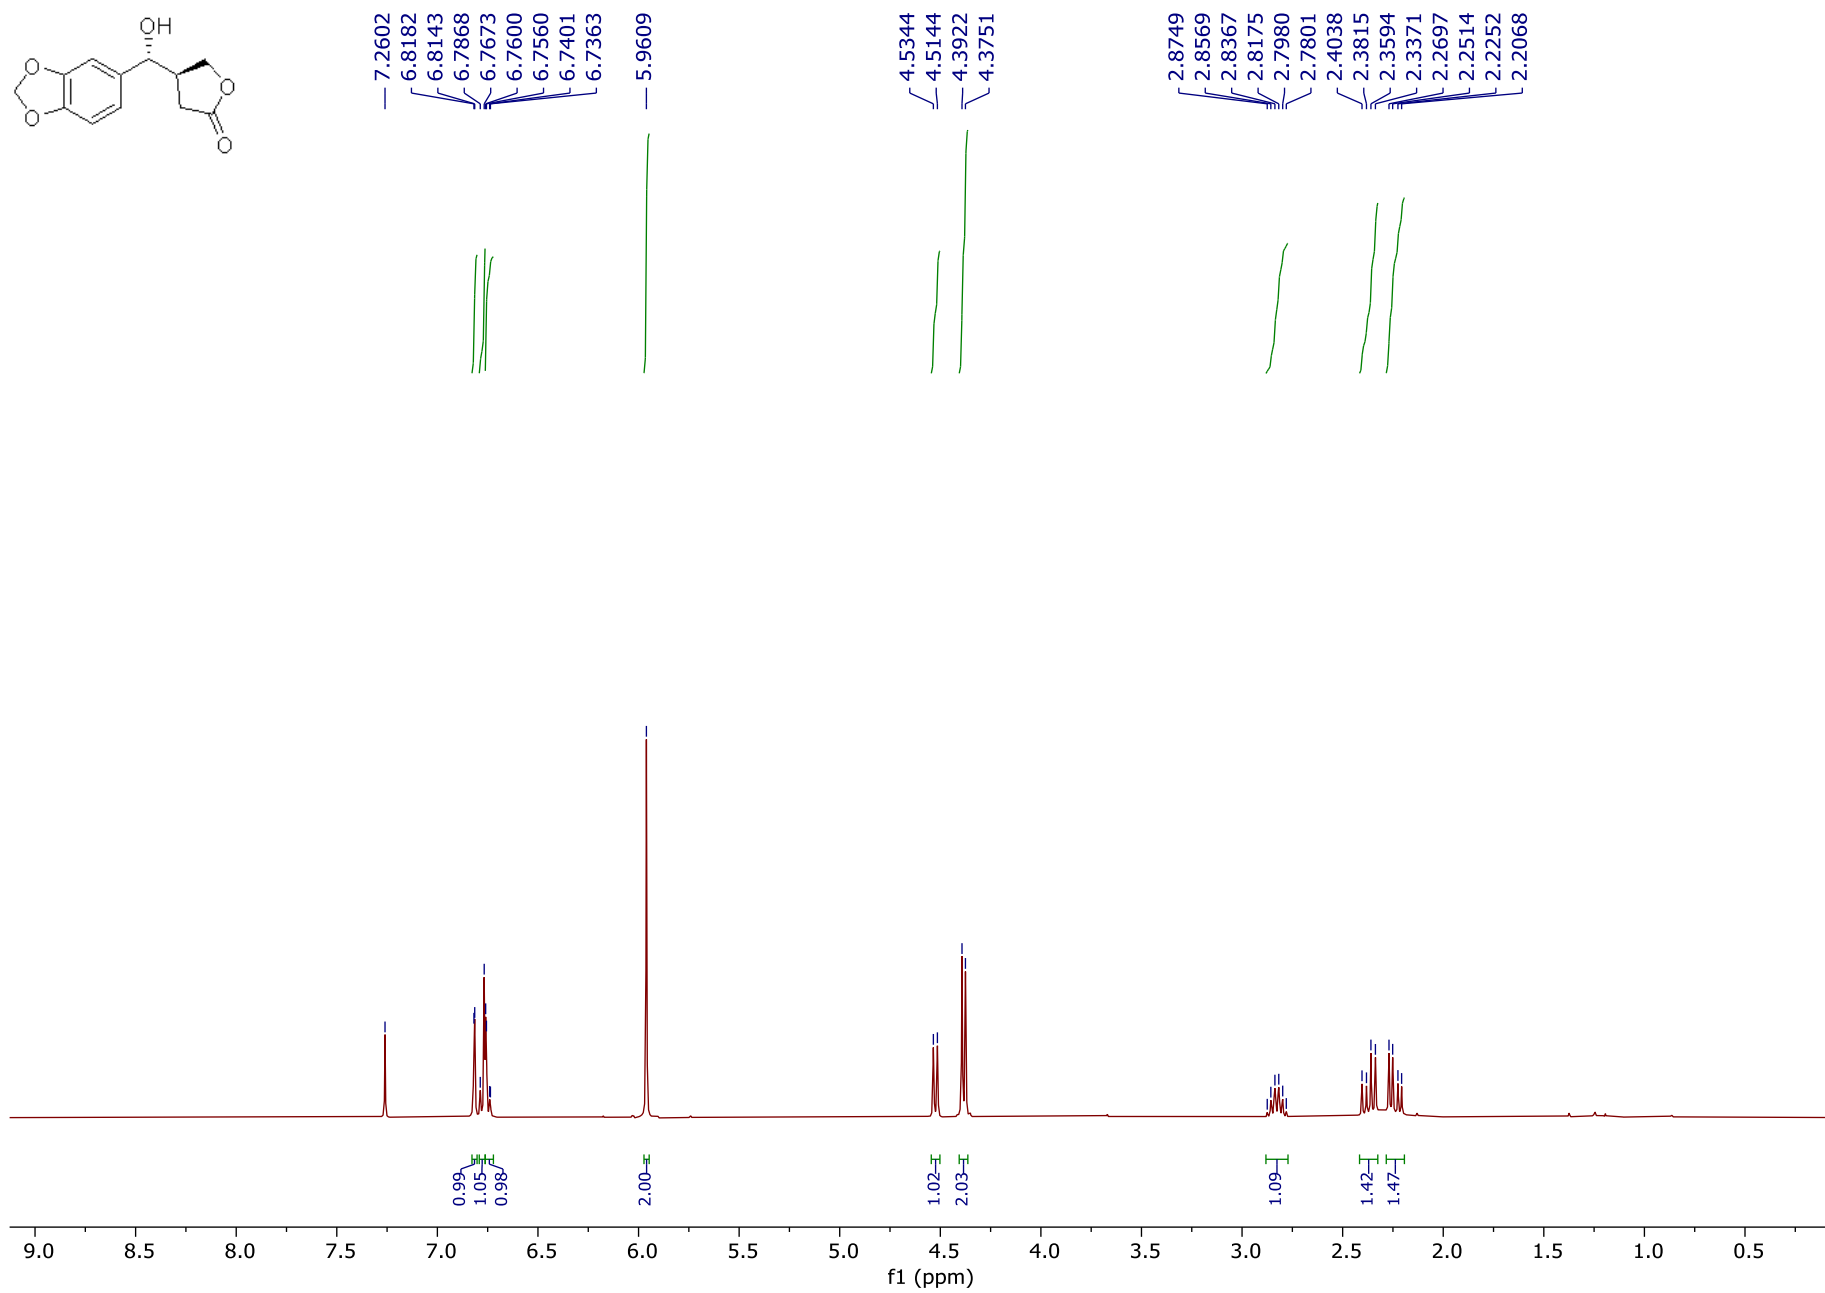

**<sup>13</sup>C NMR of lactone 13b (101 MHz, CDCl<sub>3</sub>)**

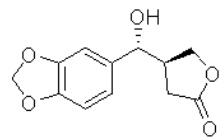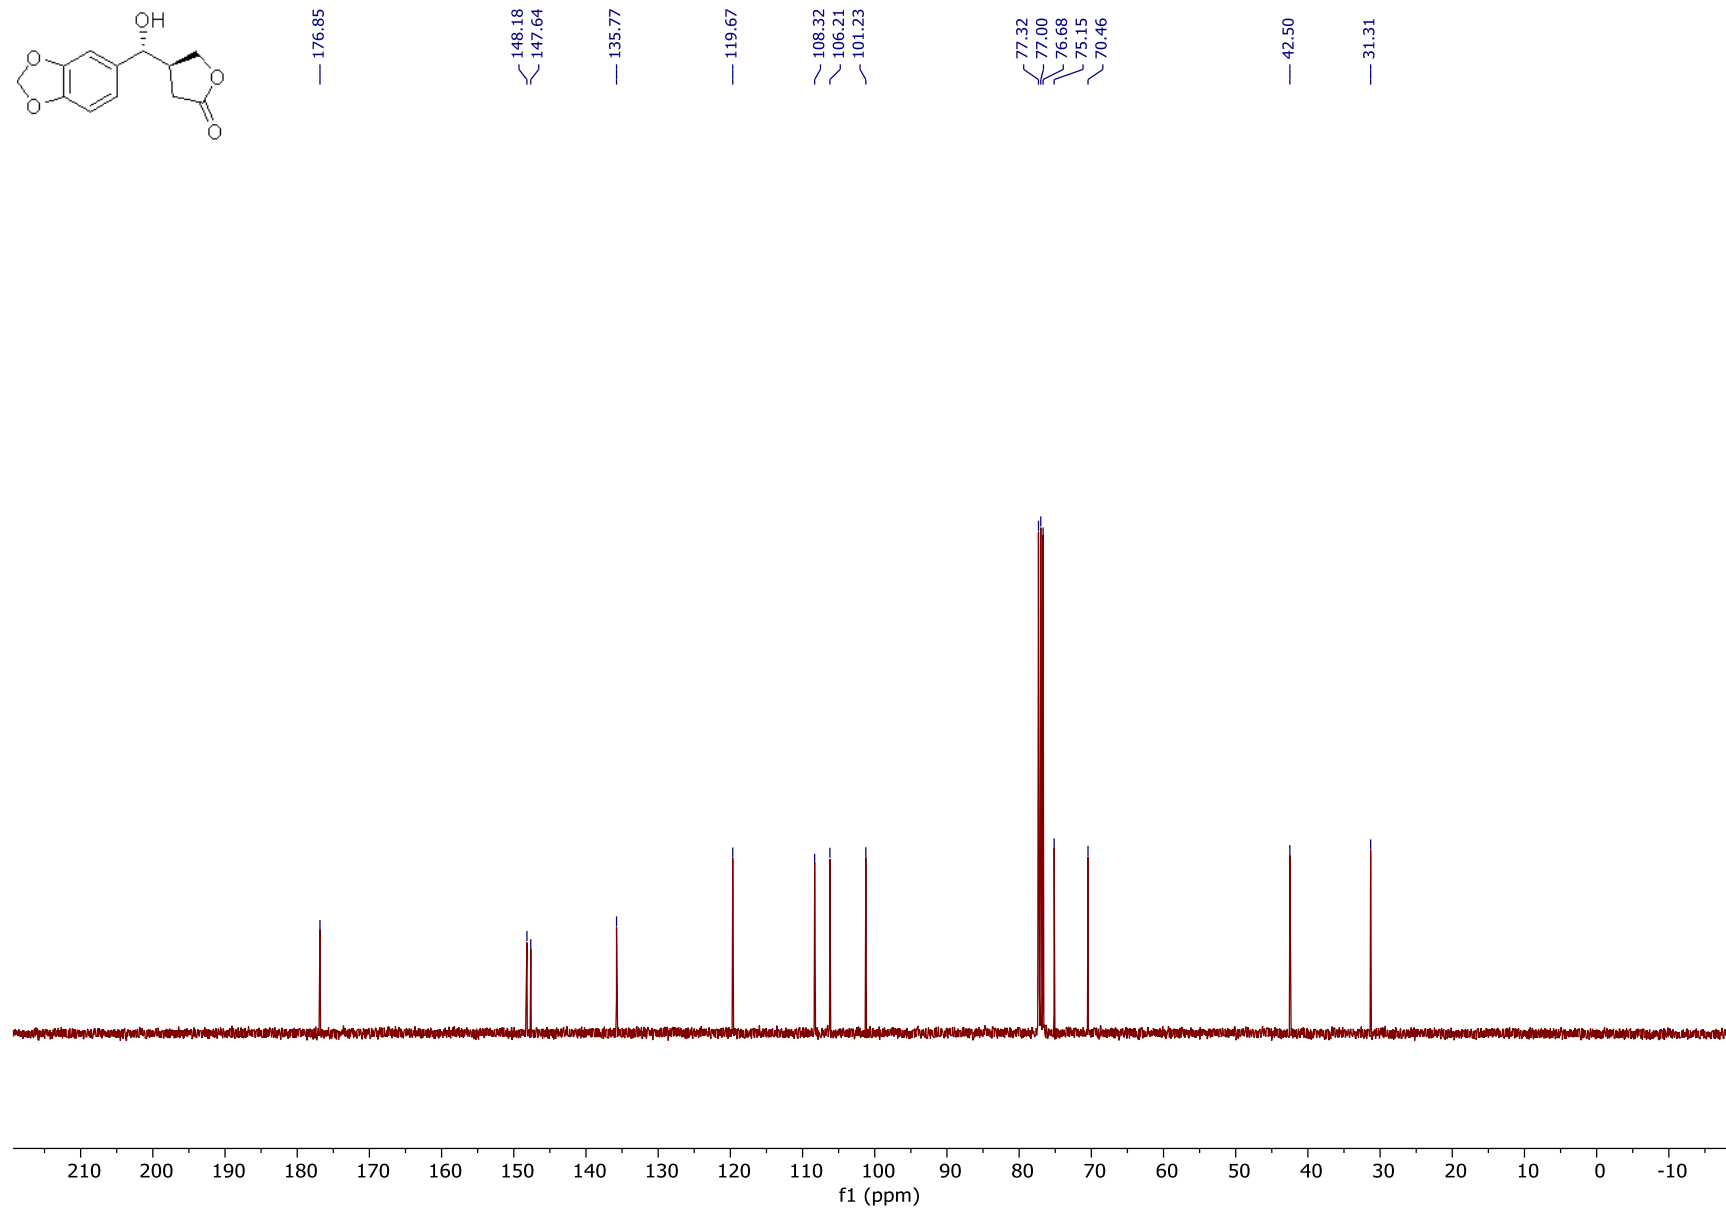

# <sup>1</sup>H NMR of (7'R)-Parabenzlactone 5 (400 MHz, CDCl<sub>3</sub>)

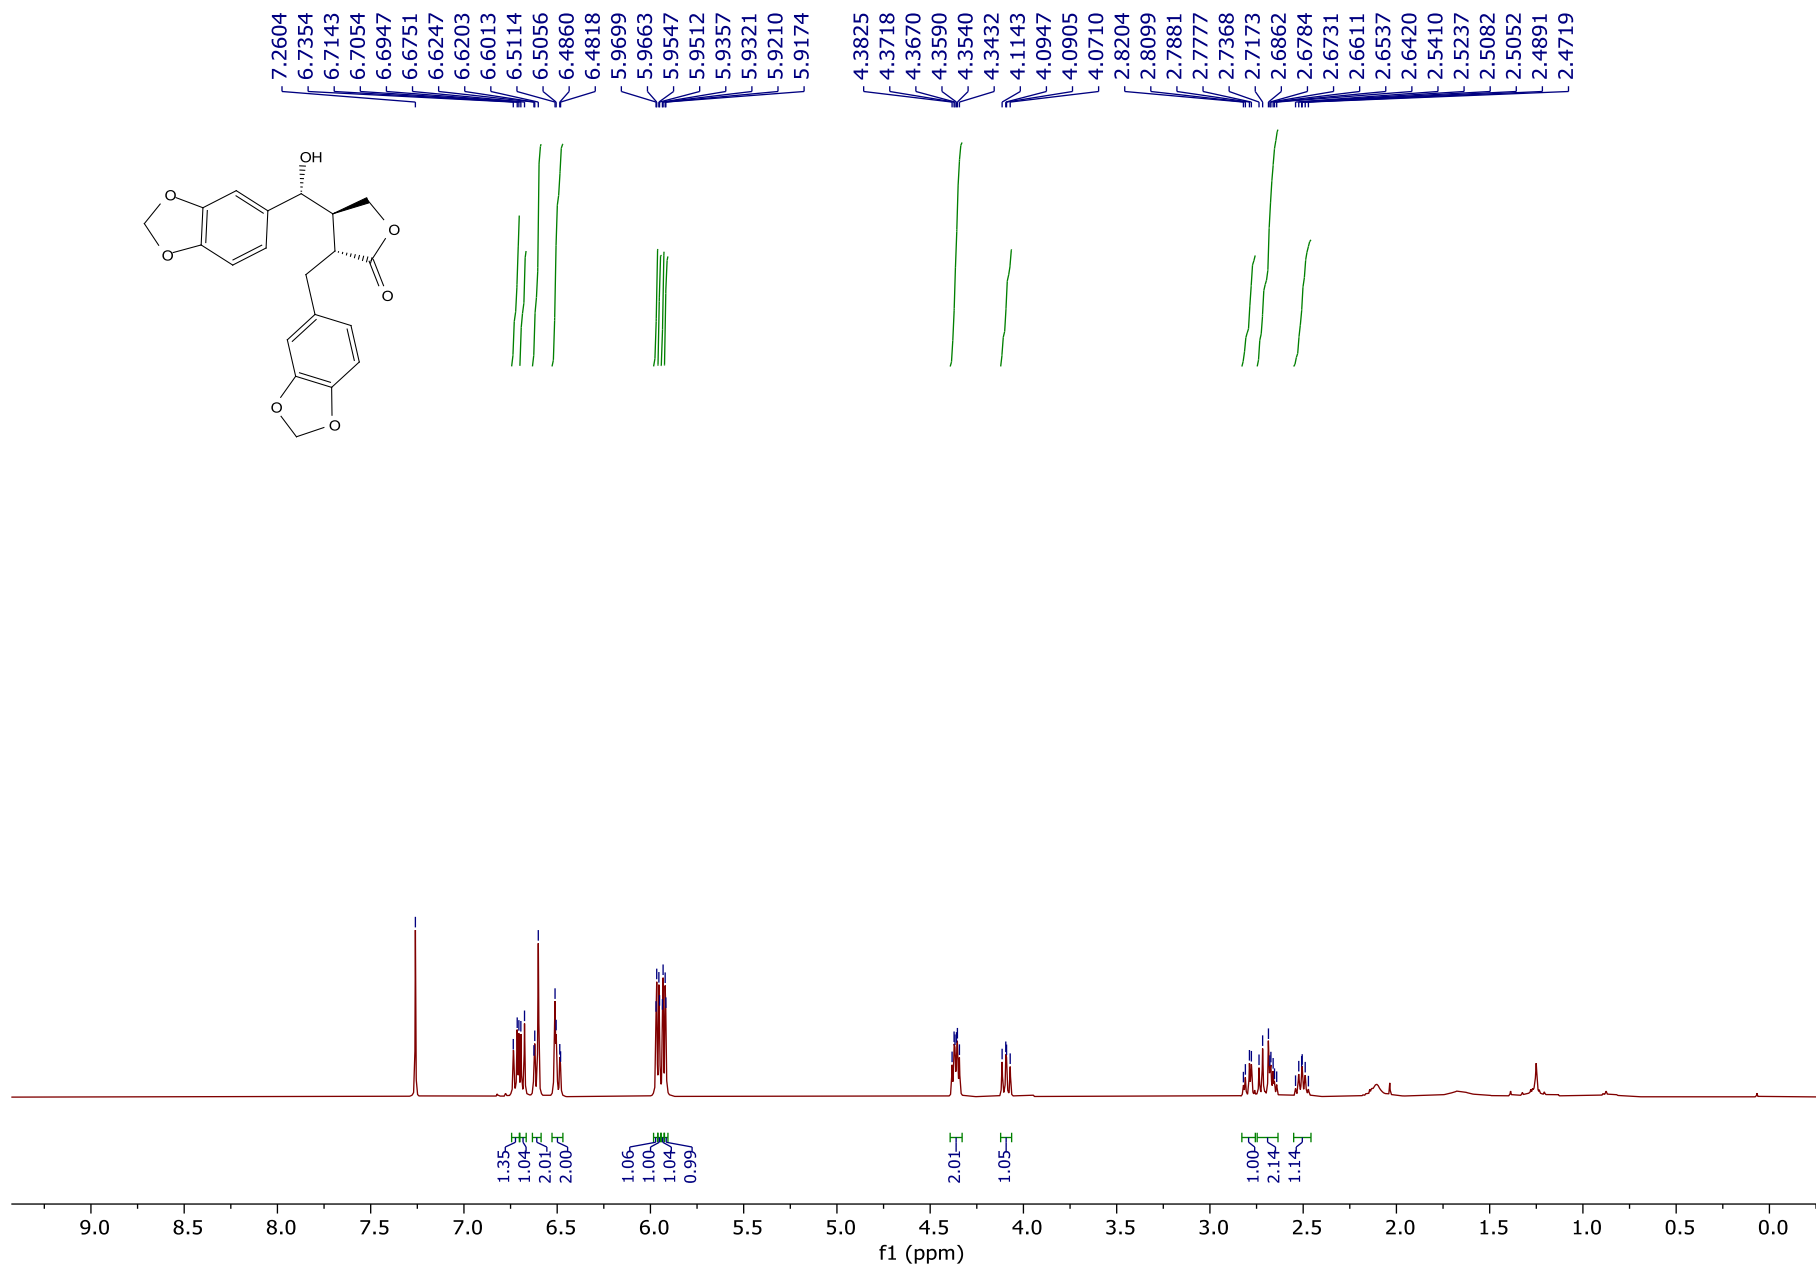

**<sup>13</sup>C NMR of Parabenzlactone 5 (101 MHz, CDCl<sub>3</sub>)**

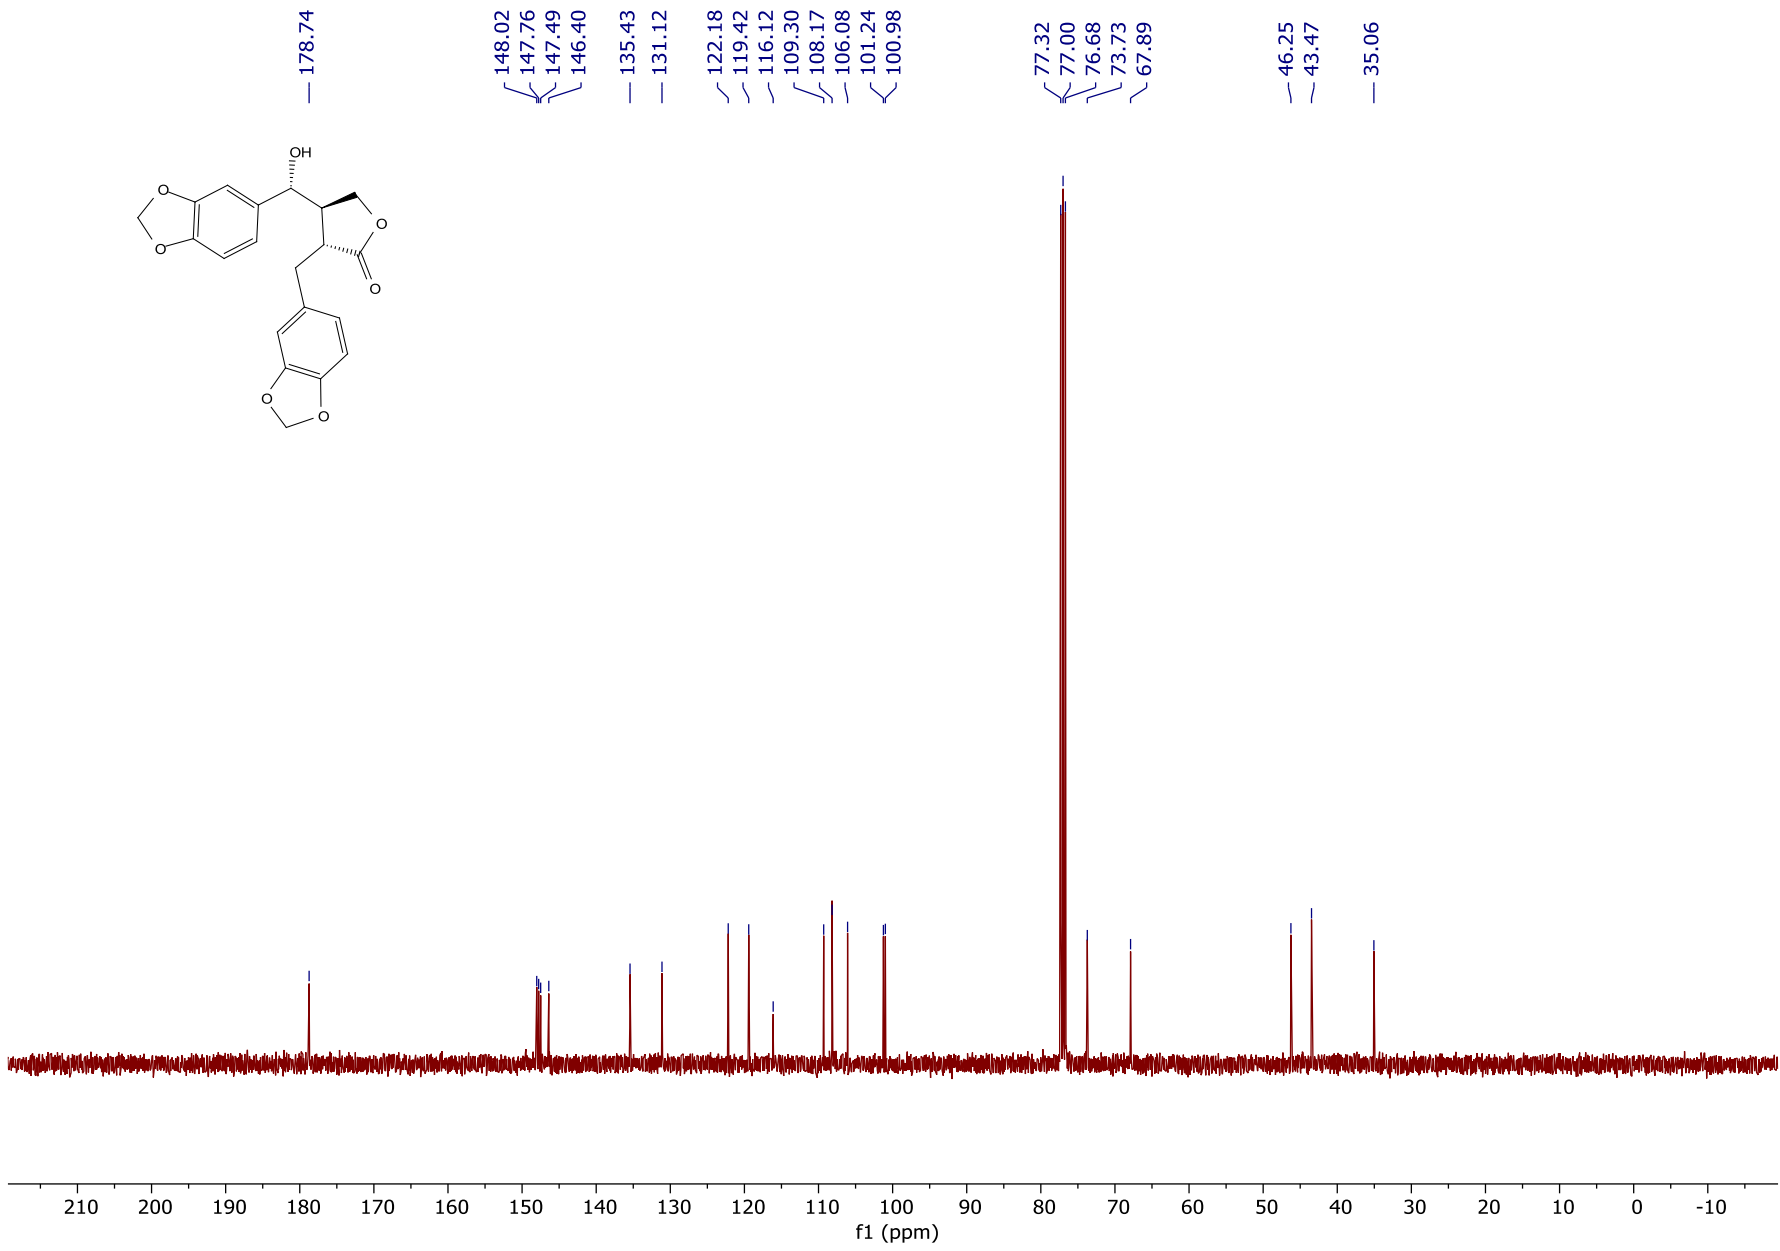

# <sup>1</sup>H NMR of Hinokinin 6 (400 MHz, CDCl<sub>3</sub>)

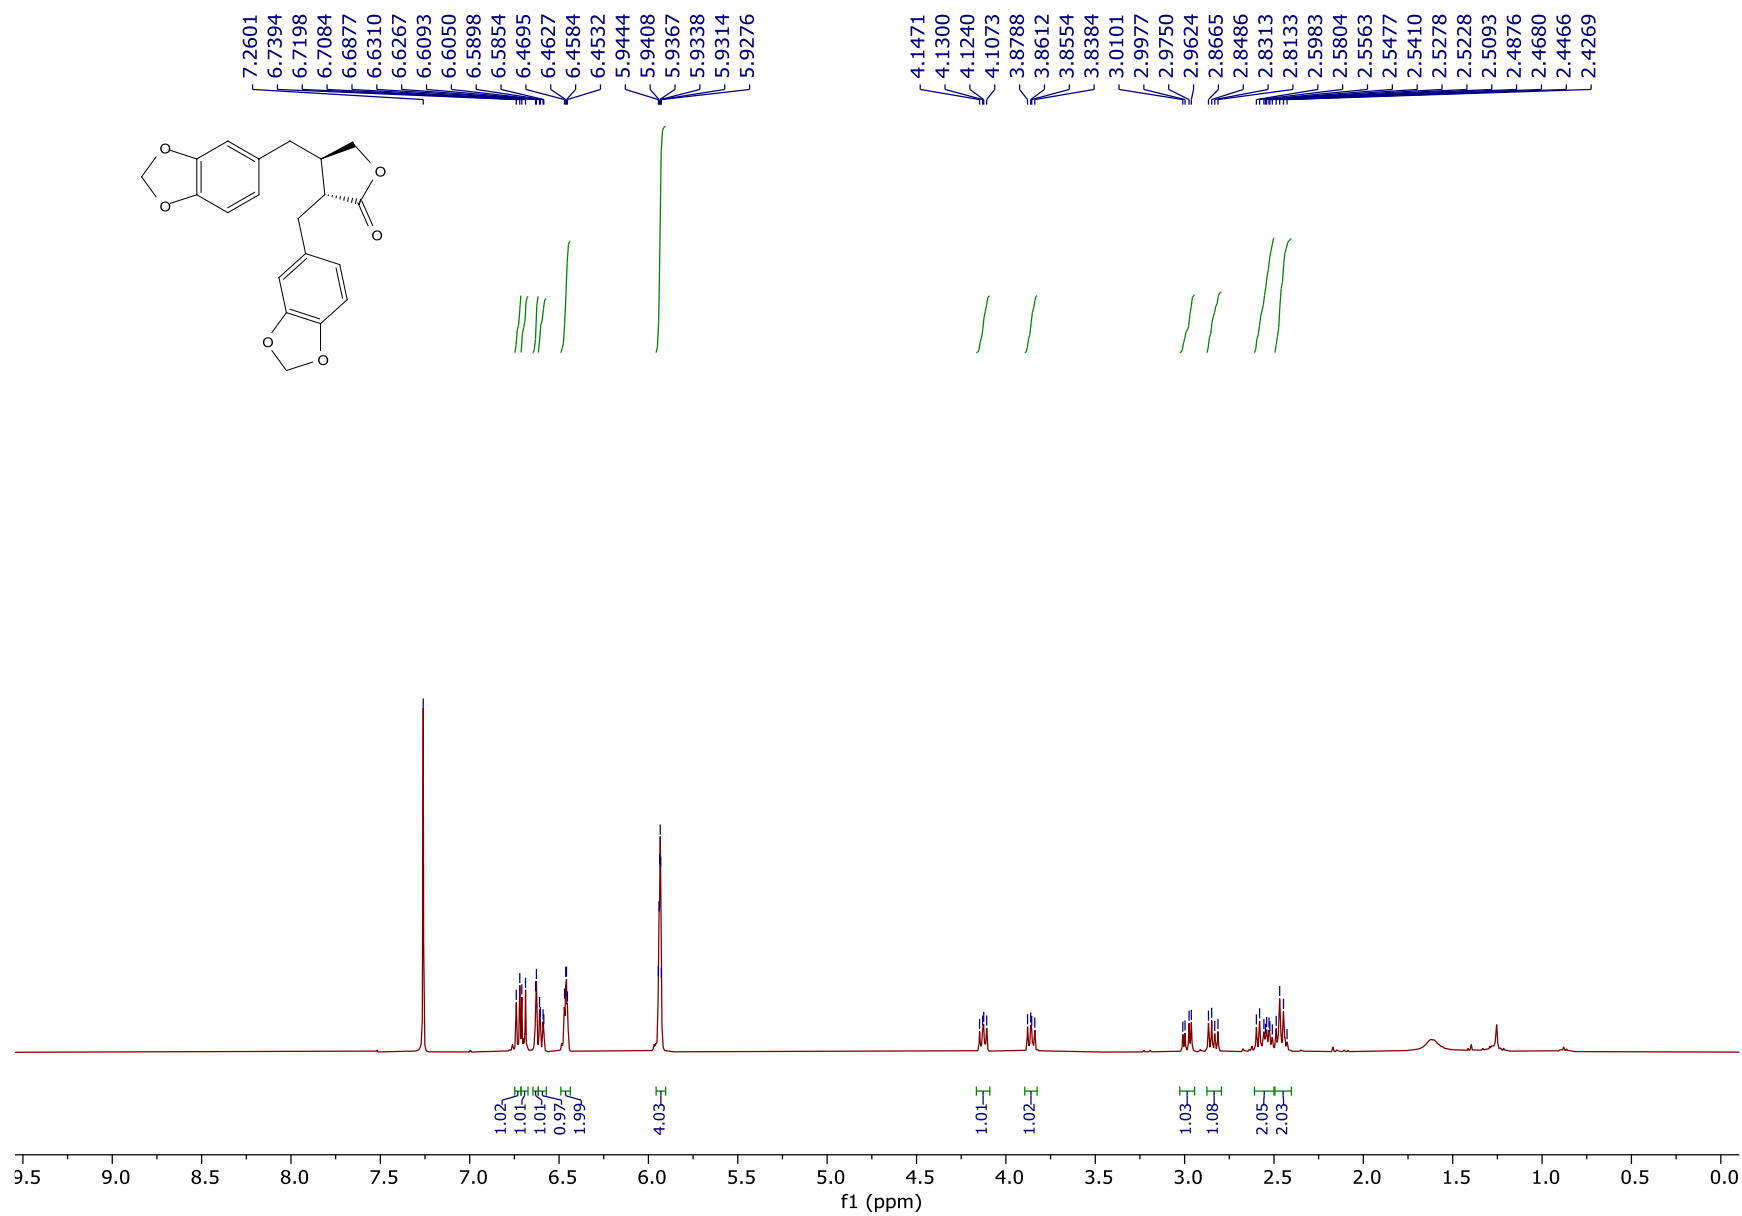

**<sup>13</sup>C NMR of Hinokinin 6 (101 MHz, CDCl<sub>3</sub>)**

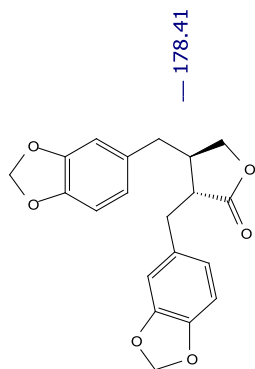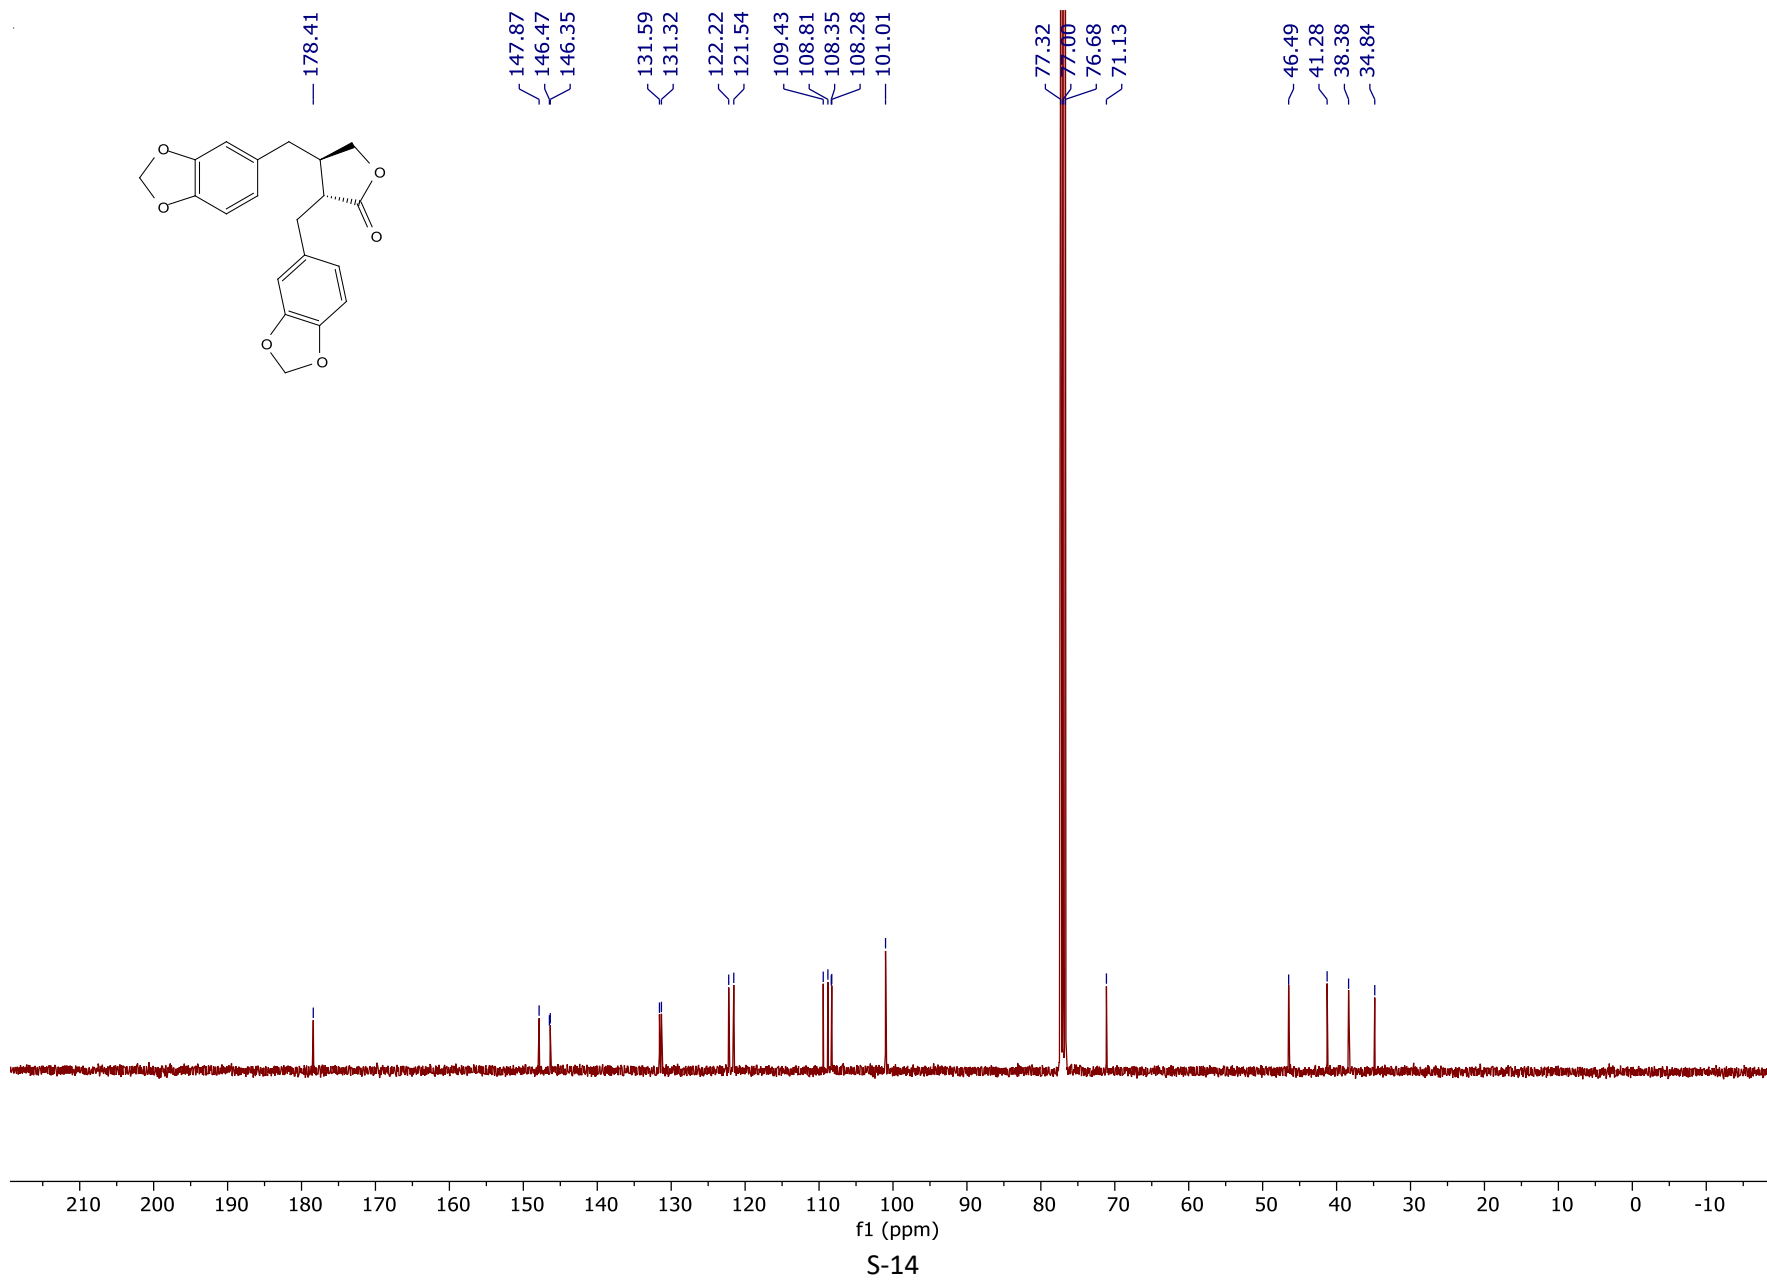

# <sup>1</sup>H NMR of compound 18 (400 MHz, CDCl<sub>3</sub>)

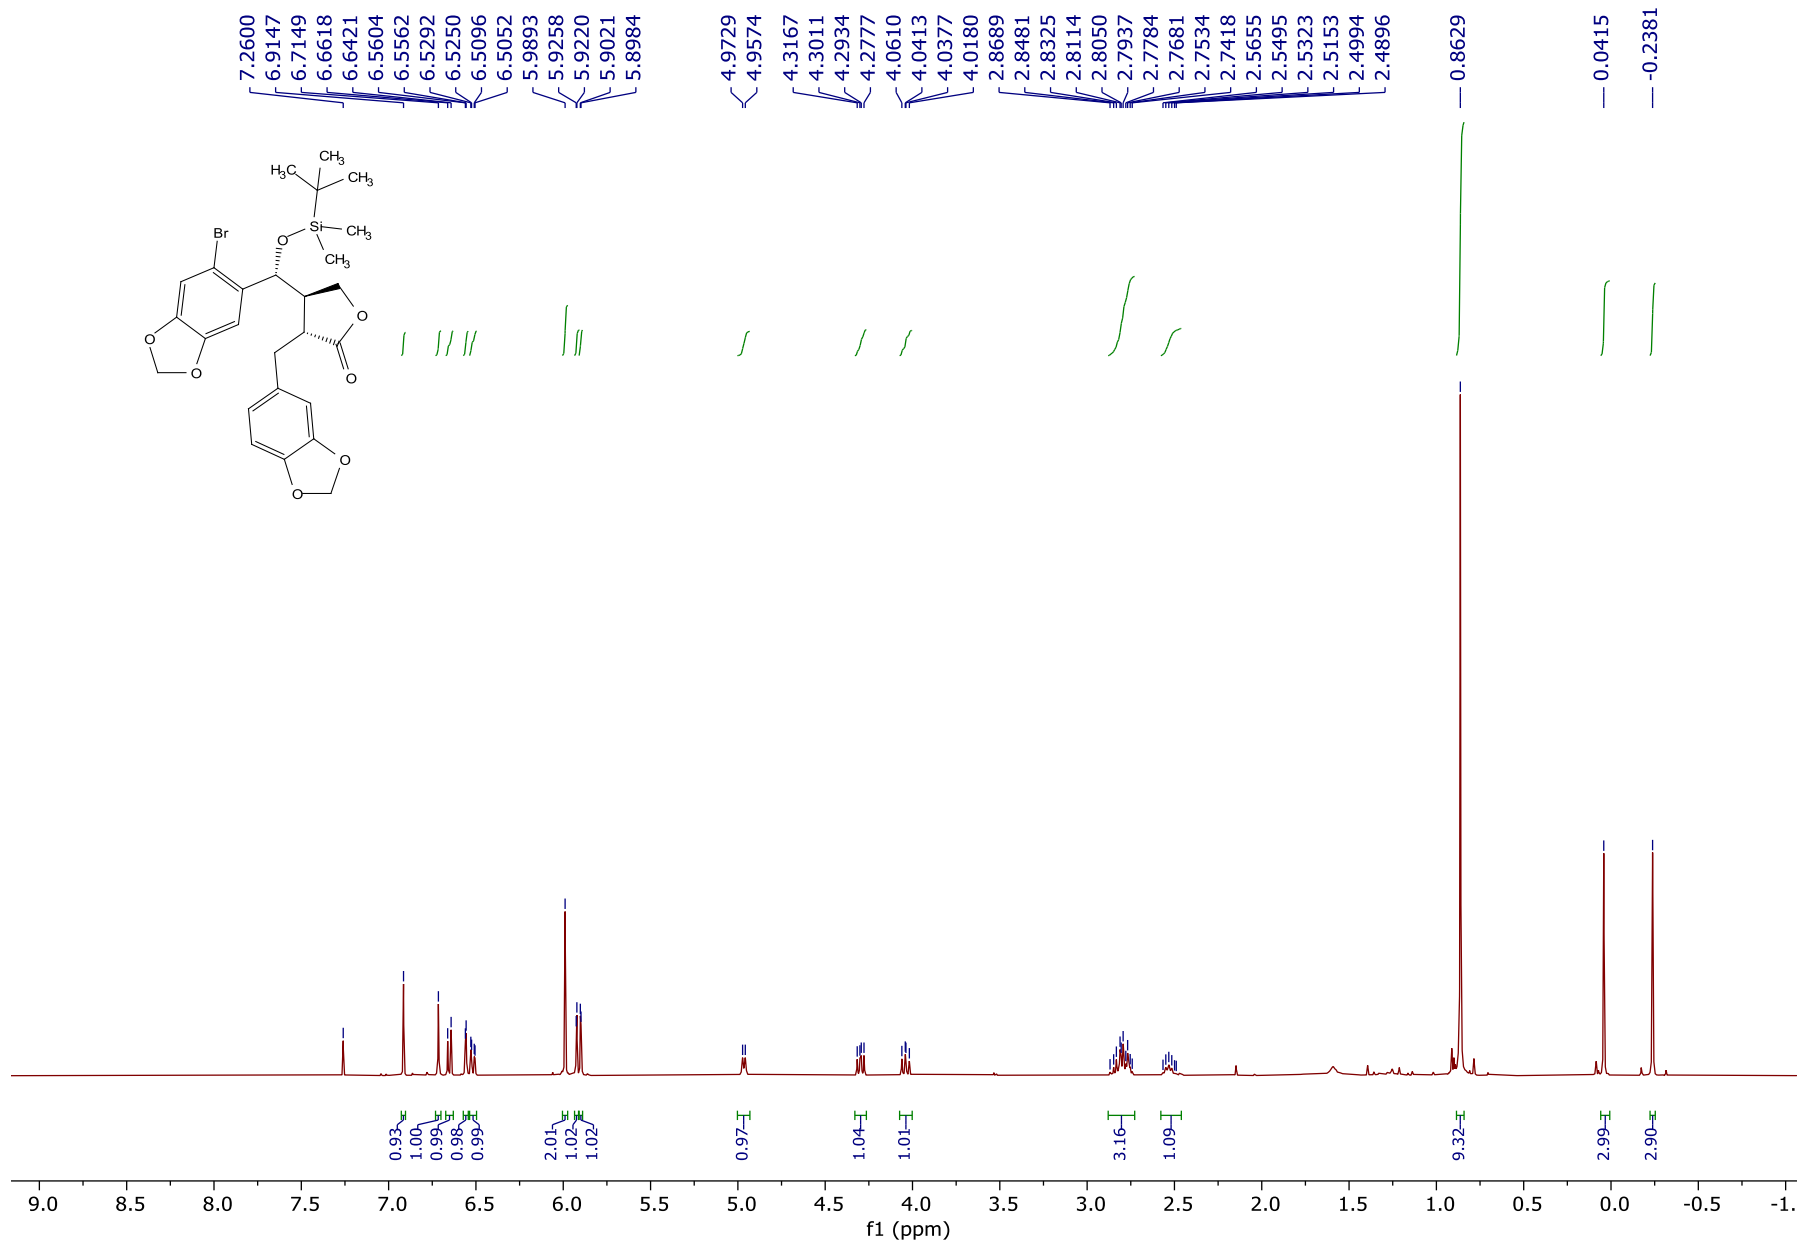

**$^{13}\text{C}$  NMR of compound 18 (101 MHz,  $\text{CDCl}_3$ )**

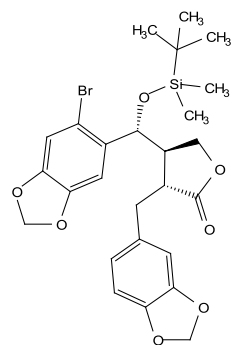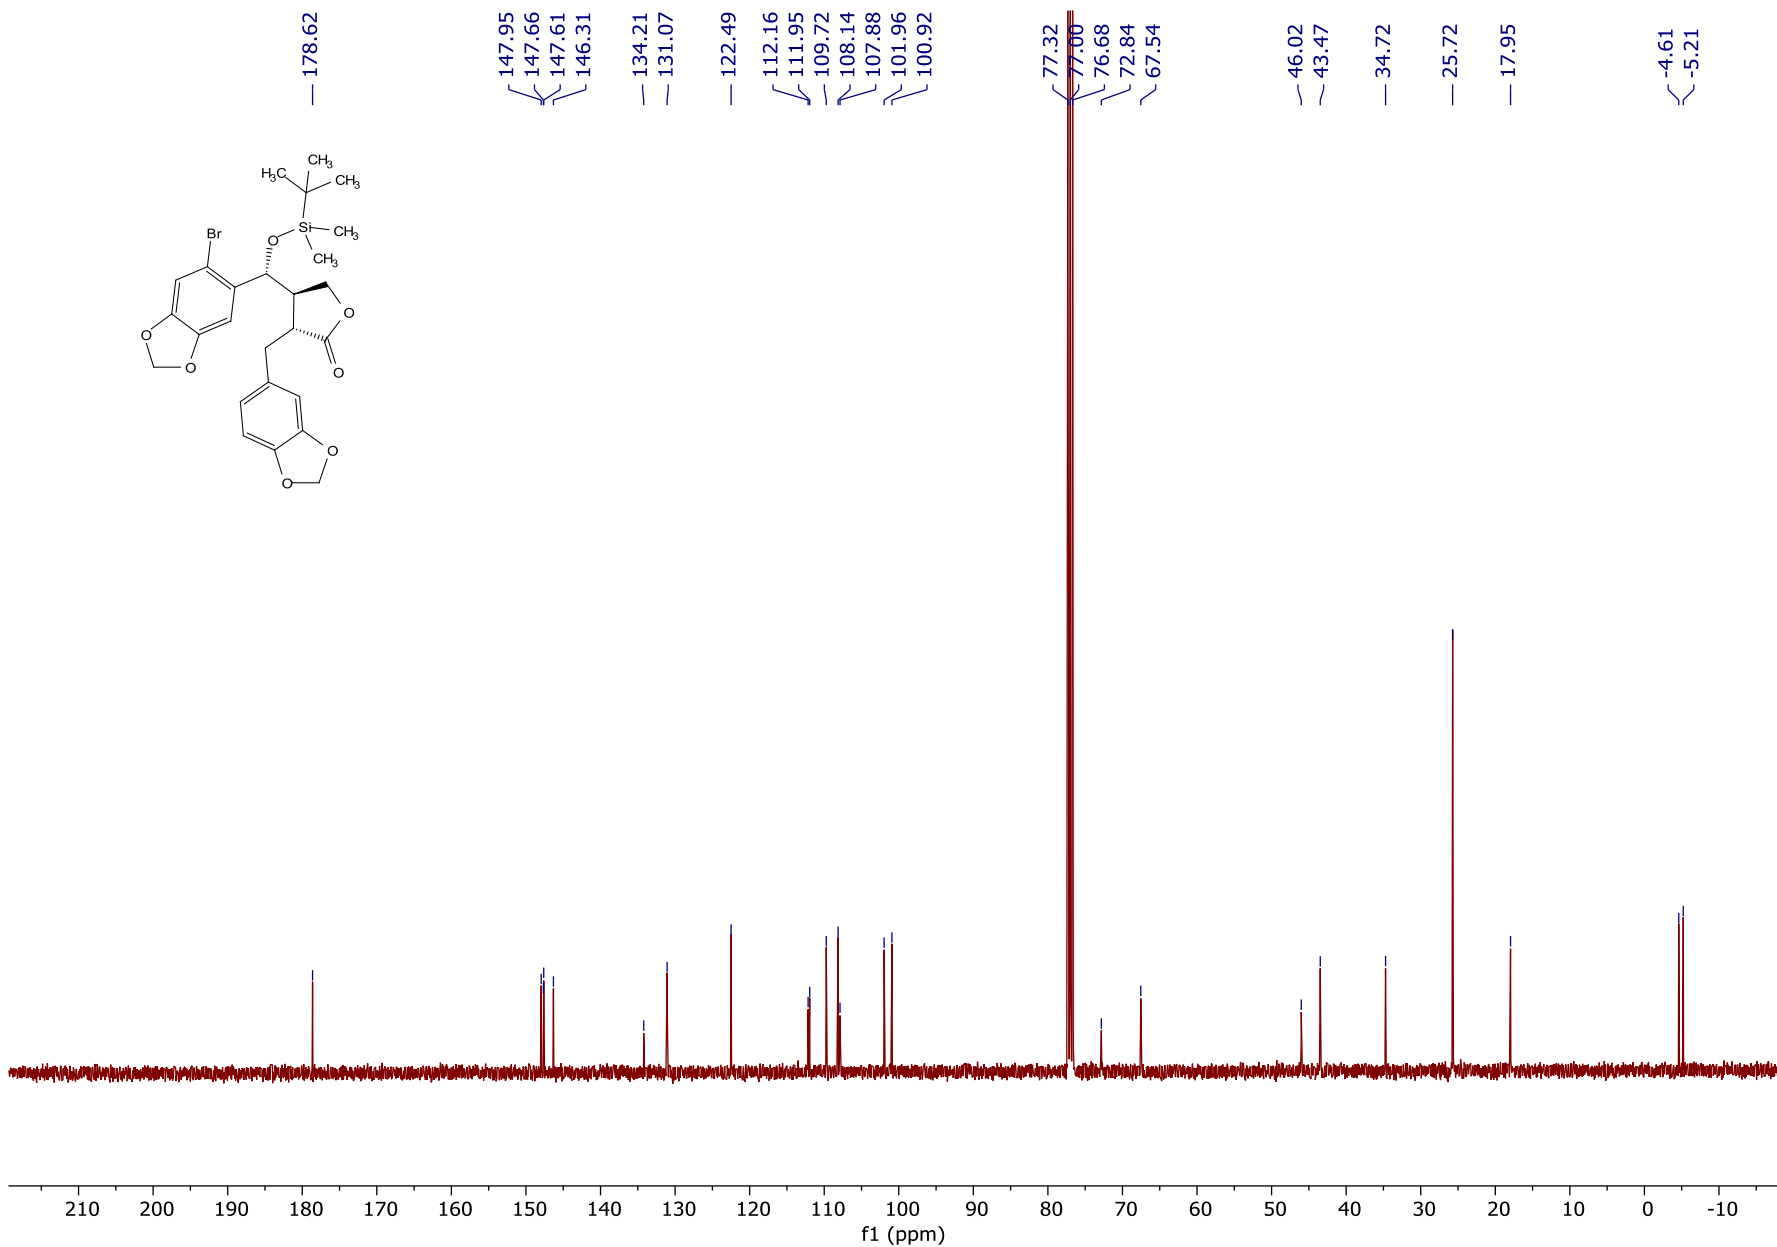



# <sup>1</sup>H NMR of Bromo-parabenzlactone 17 (400 MHz, CDCl<sub>3</sub>)

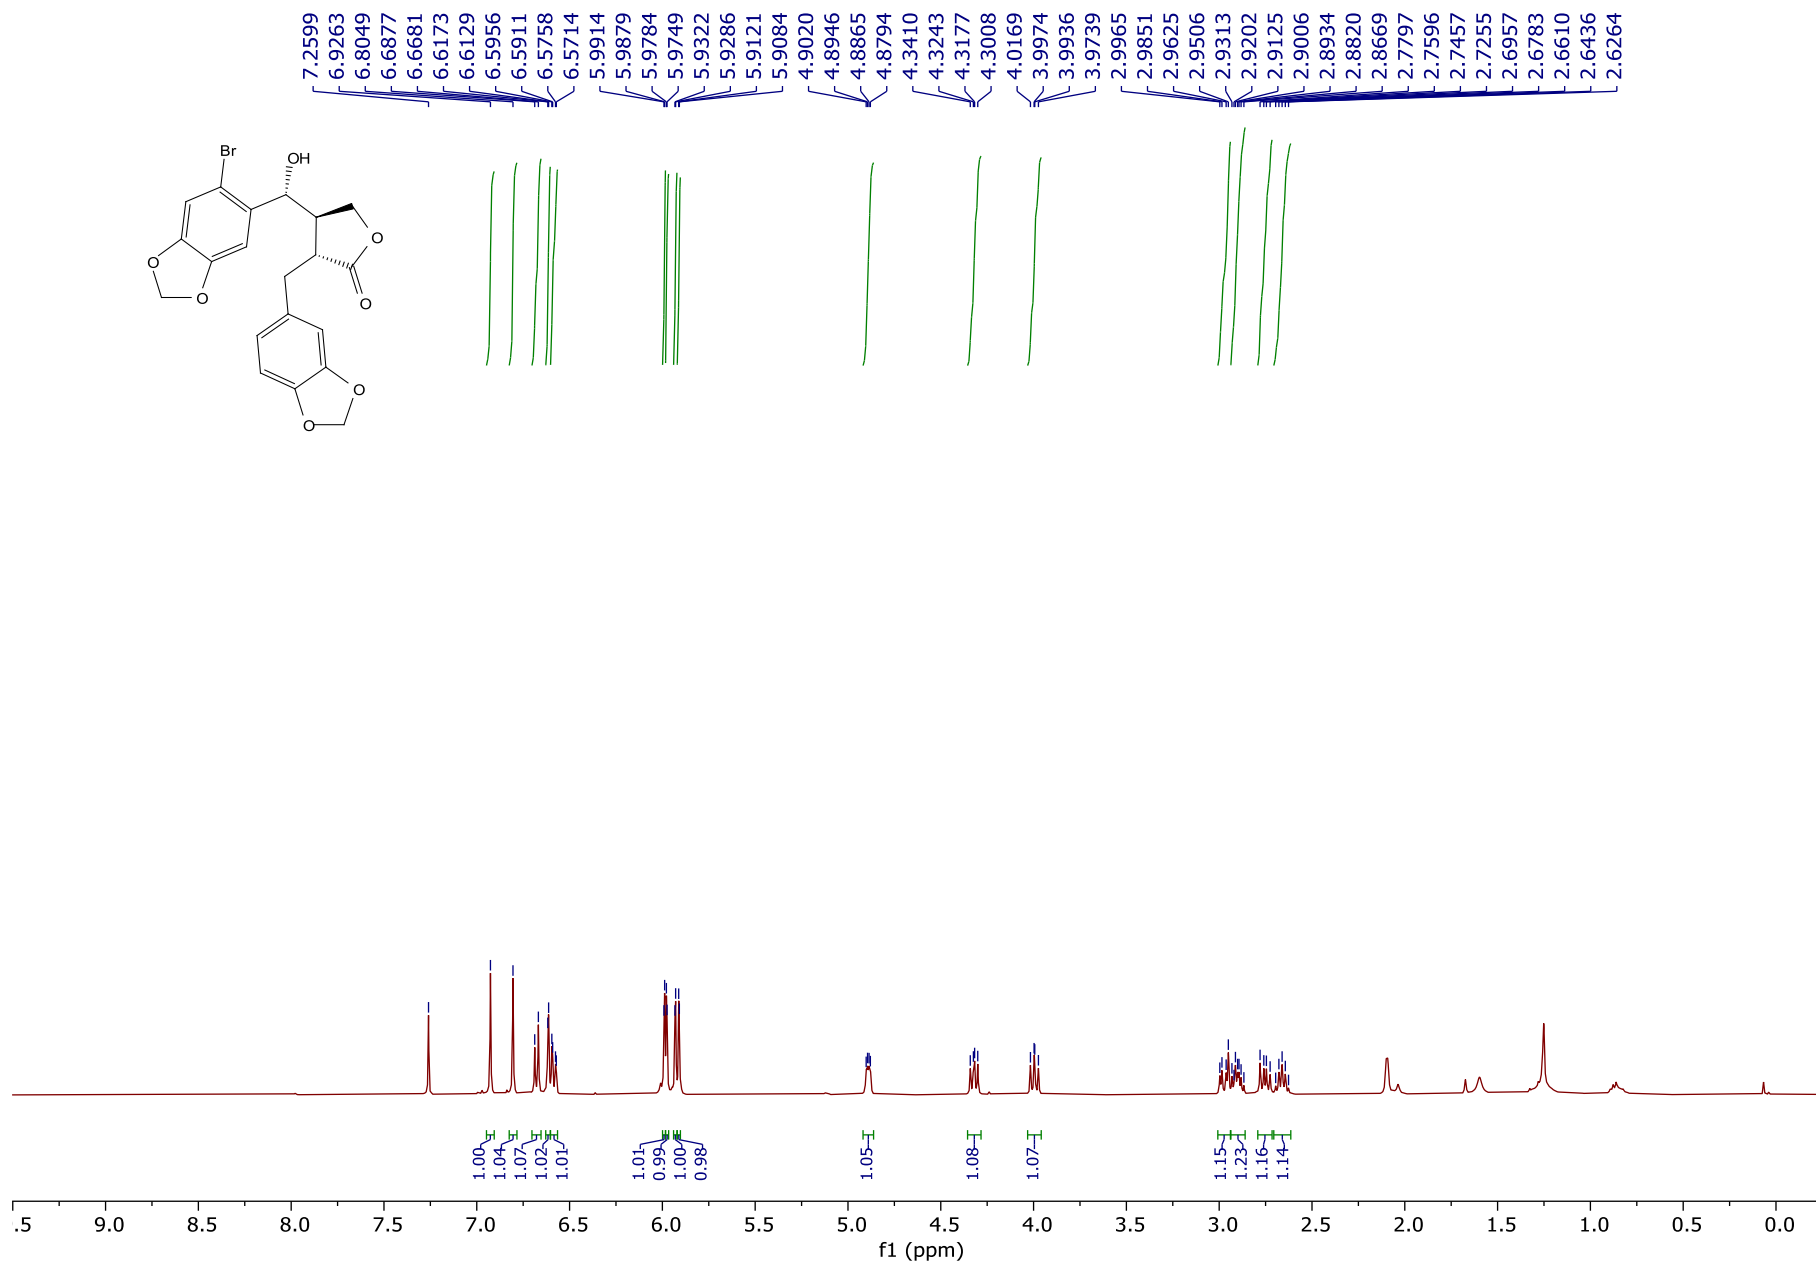

**<sup>13</sup>C NMR of Bromo-parabenzlactone 17 (101 MHz, CDCl<sub>3</sub>)**

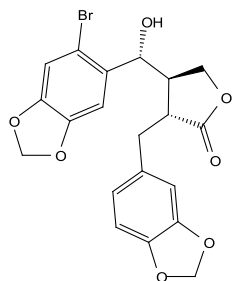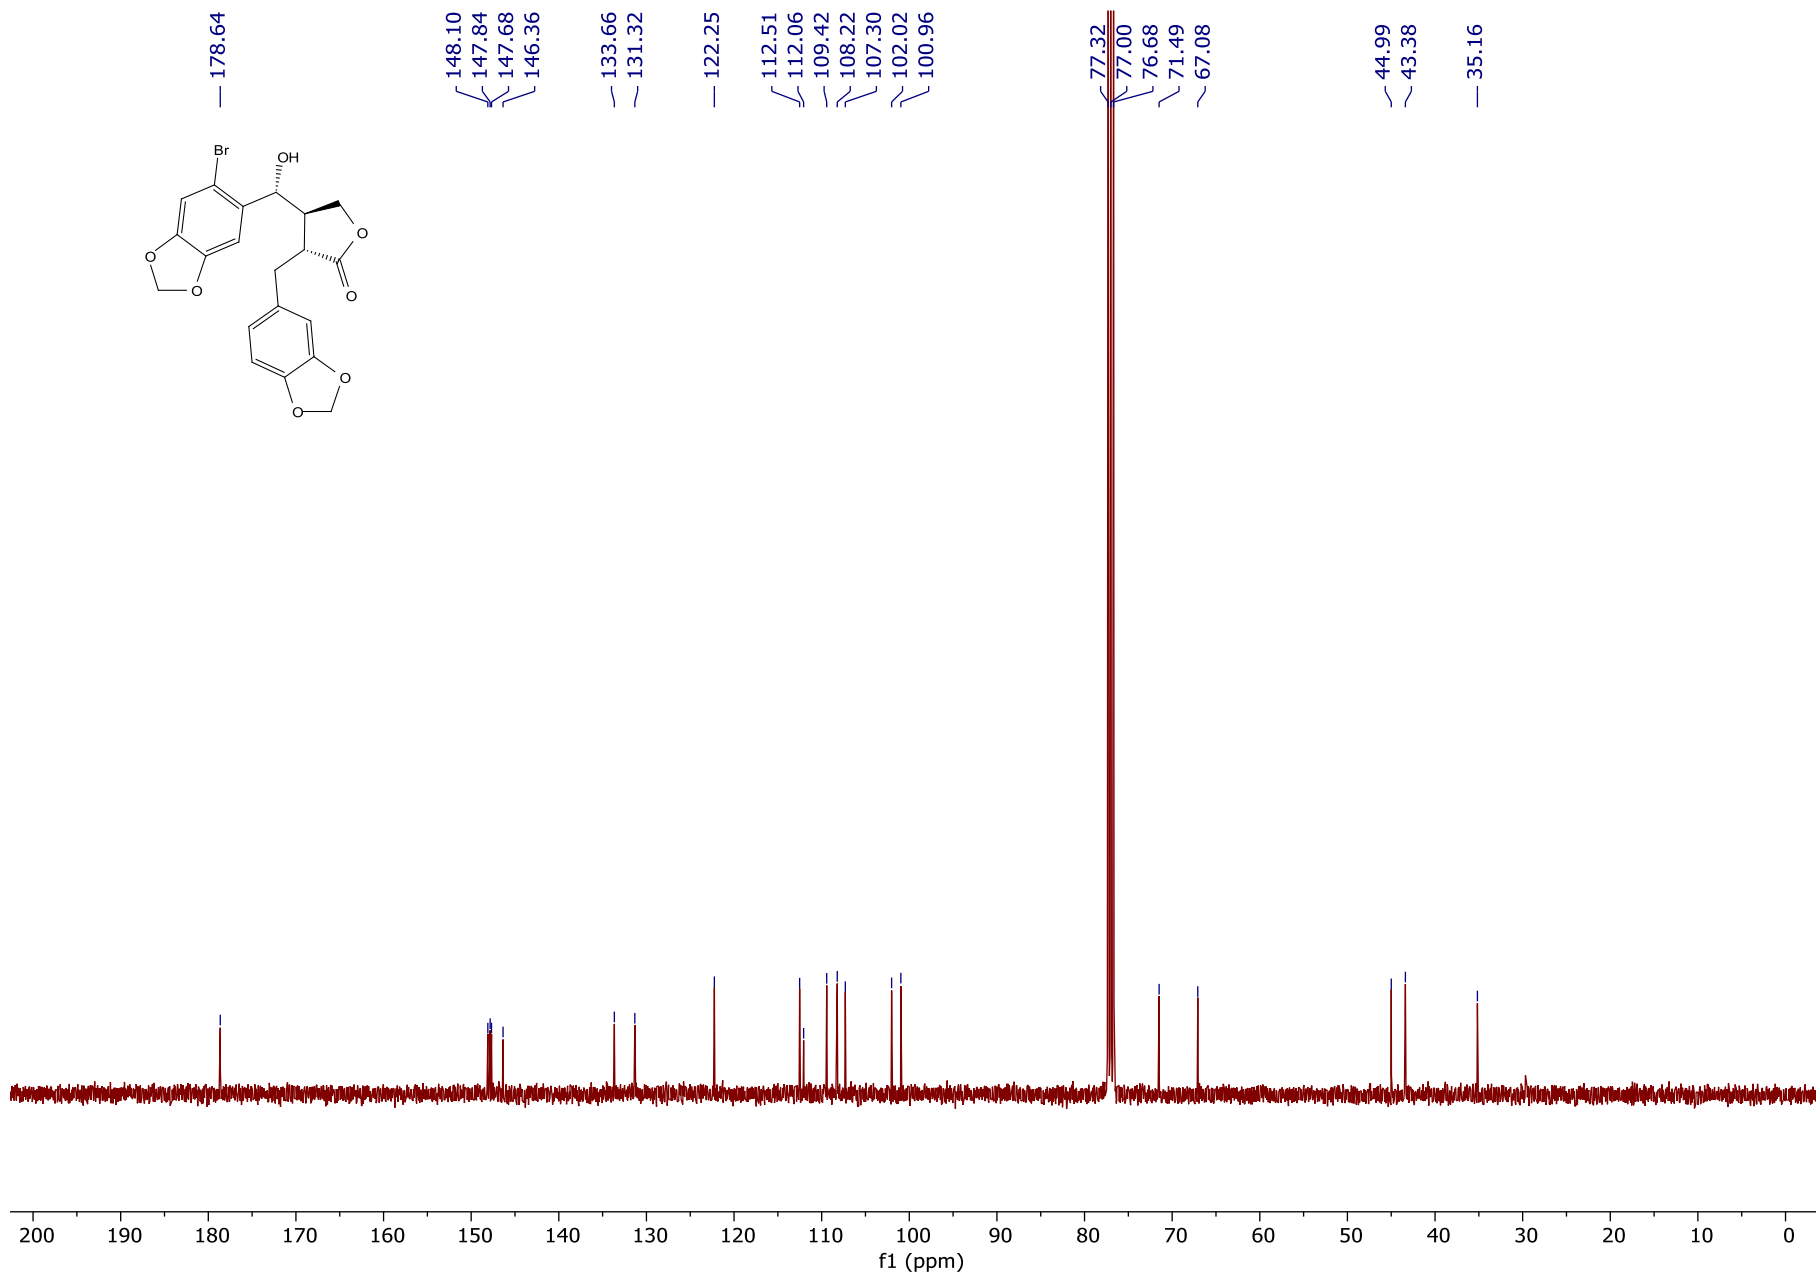

# <sup>1</sup>H NMR of (7'R)-Hydroxyatein 7 (400 MHz, CDCl<sub>3</sub>)

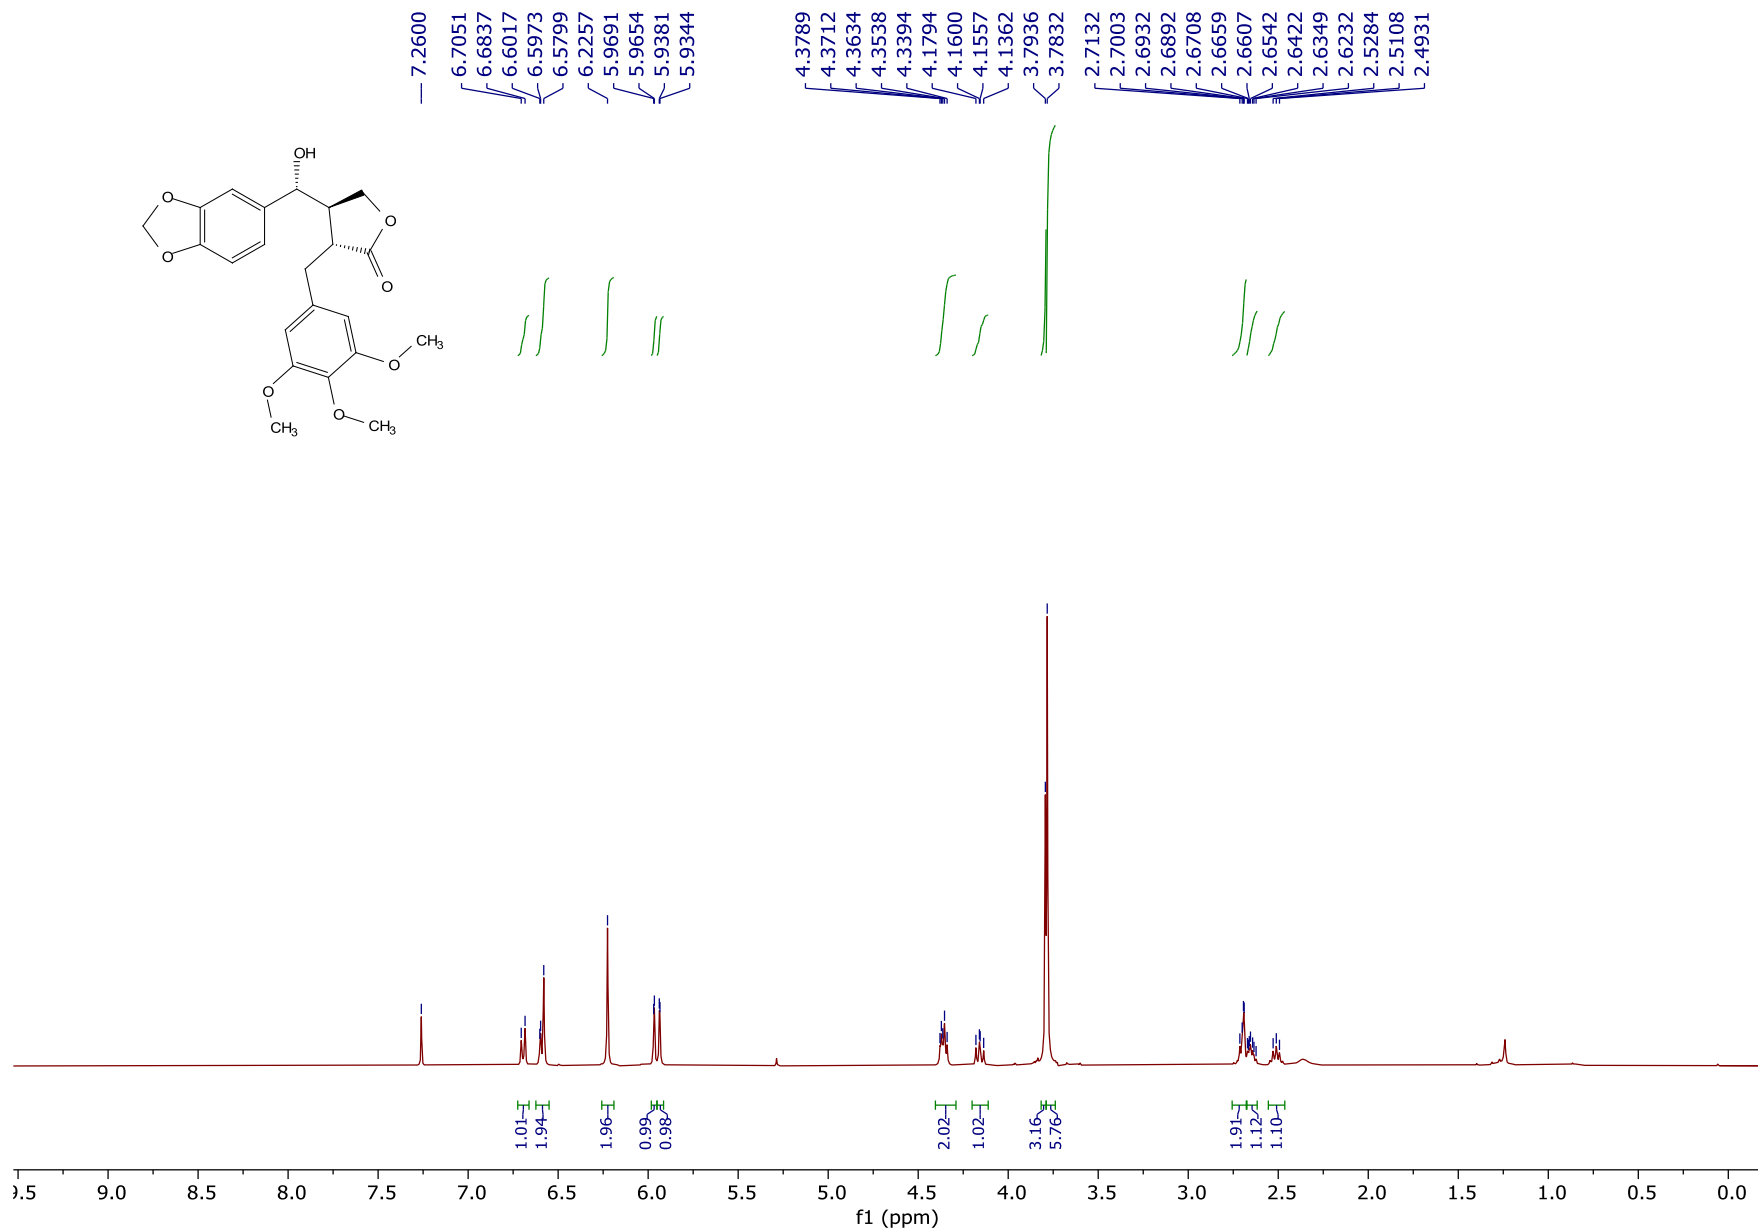

**<sup>13</sup>C NMR of (7'R)-Hydroxyatein 7 (101 MHz, CDCl<sub>3</sub>)**

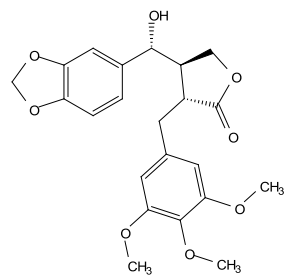

— 178.74

— 153.12

— 148.18

— 147.65

— 136.70

— 135.39

— 133.09

— 119.58

— 107.93

— 106.04

— 105.95

— 101.41

— 77.32

— 77.00

— 76.68

— 74.36

— 68.33

— 60.82

— 56.00

— 45.98

— 43.63

— 35.45

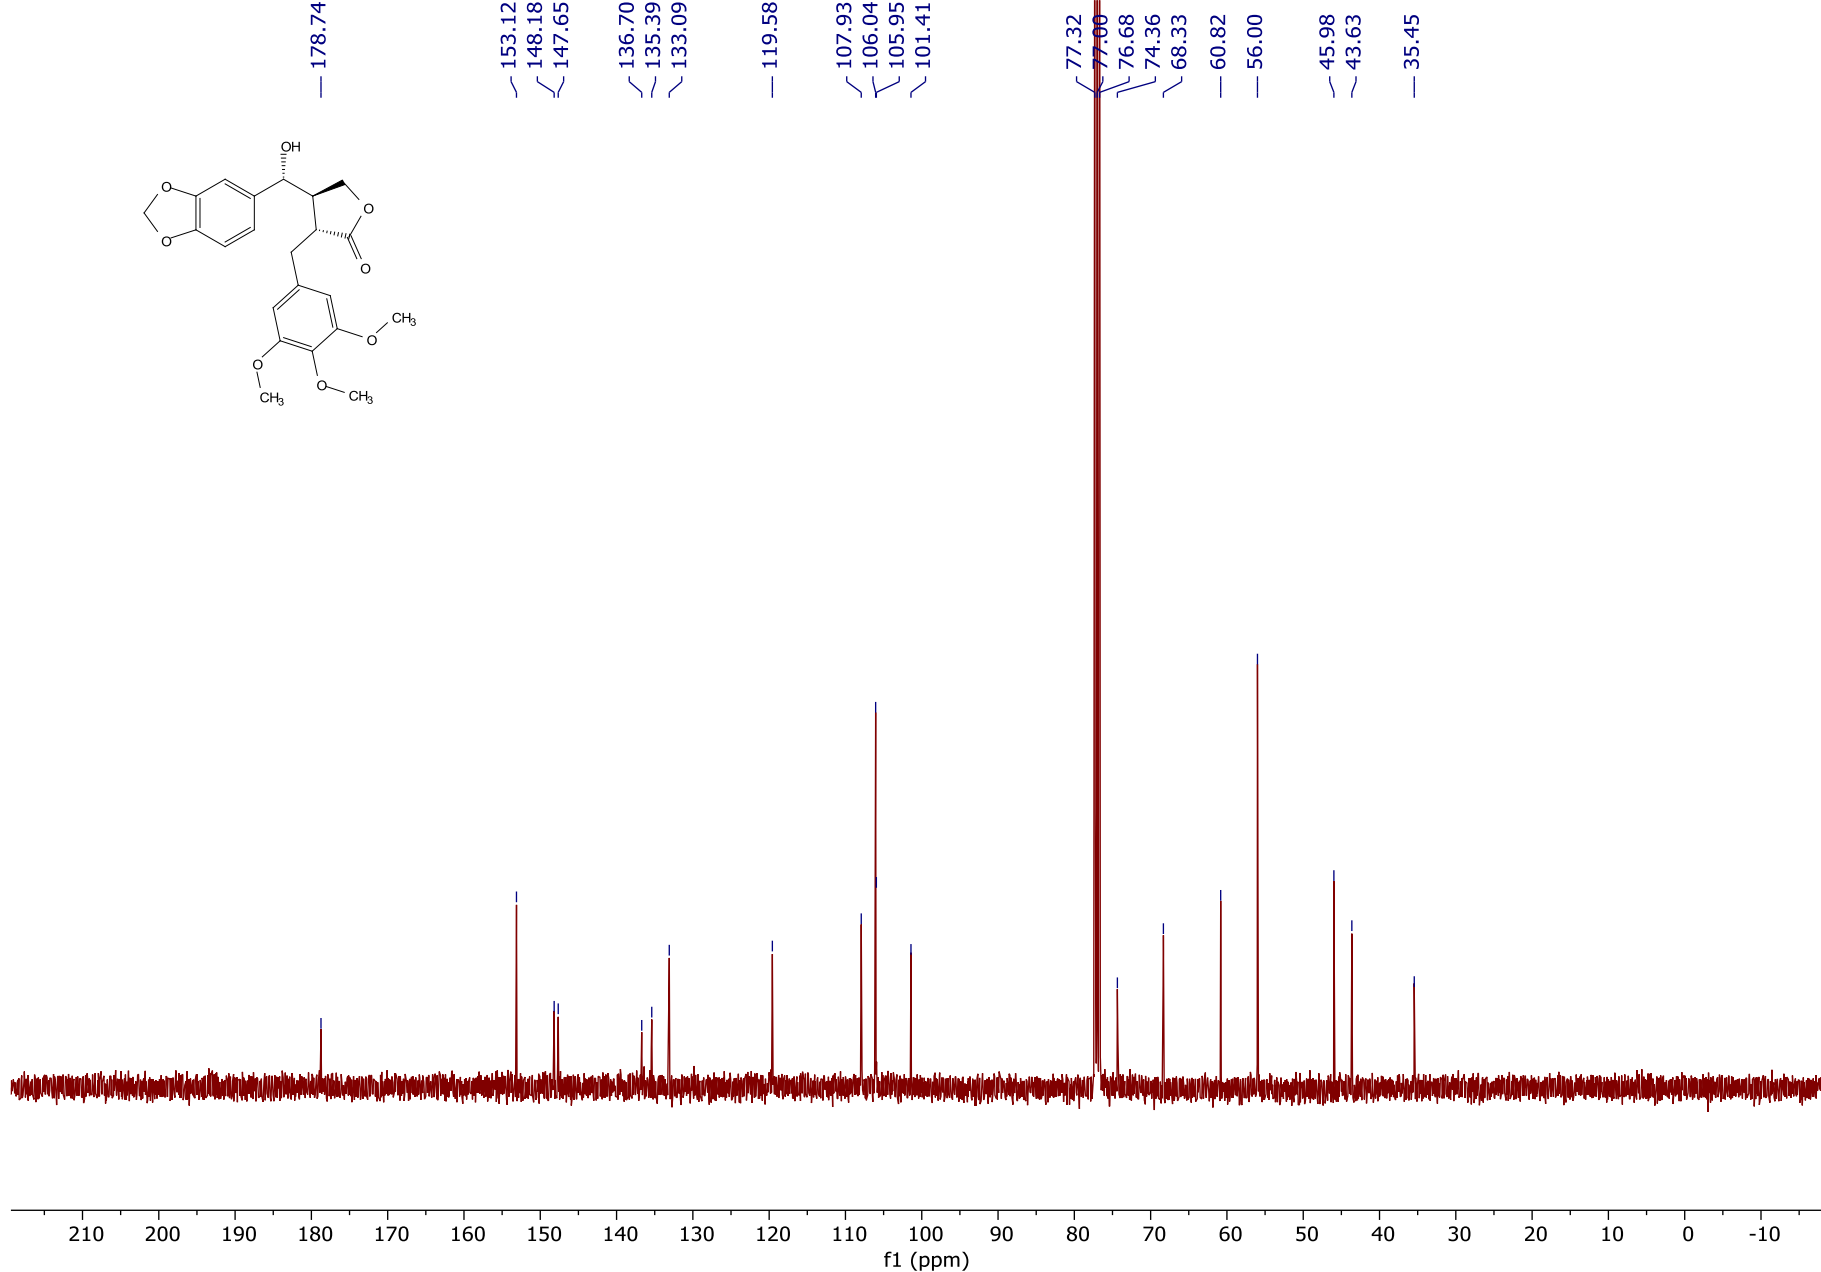

# <sup>1</sup>H NMR of (-)-Yatein 8 (400 MHz, CDCl<sub>3</sub>)

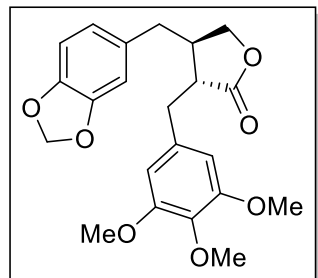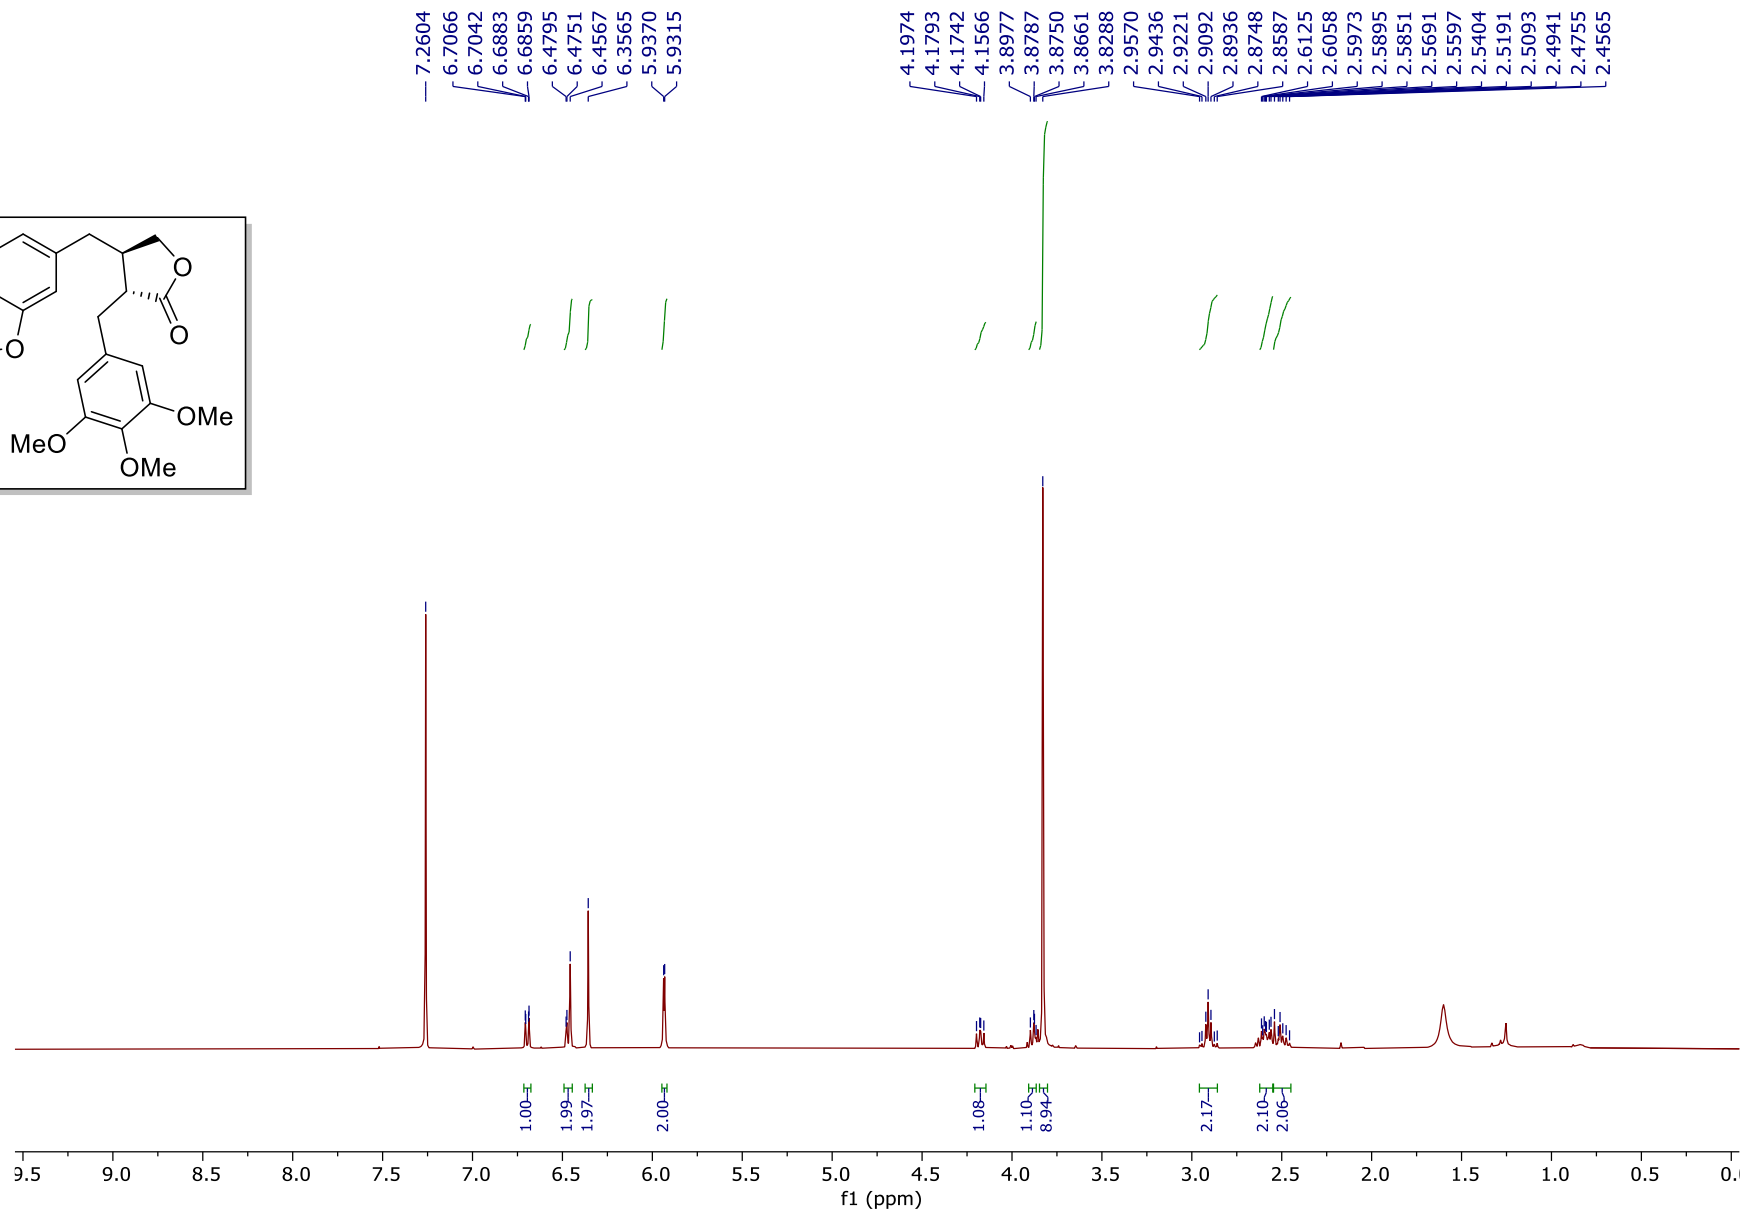

**<sup>13</sup>C NMR of (-)- yatein 8 (101 MHz, CDCl<sub>3</sub>)**

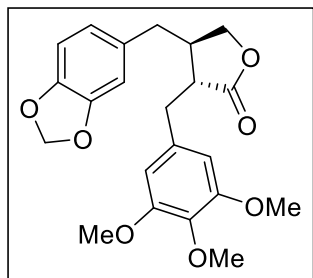

— 178.52

— 153.27  
/ 147.94  
— 146.42

— 136.88  
/ 133.32  
— 131.52

— 121.54

— 108.77  
/ 108.32  
/ 106.22  
— 101.10

— 77.32  
/ 77.00  
/ 76.68  
— 71.19

— 60.87  
— 56.11

— 46.47  
/ 41.03  
/ 38.36  
— 35.25

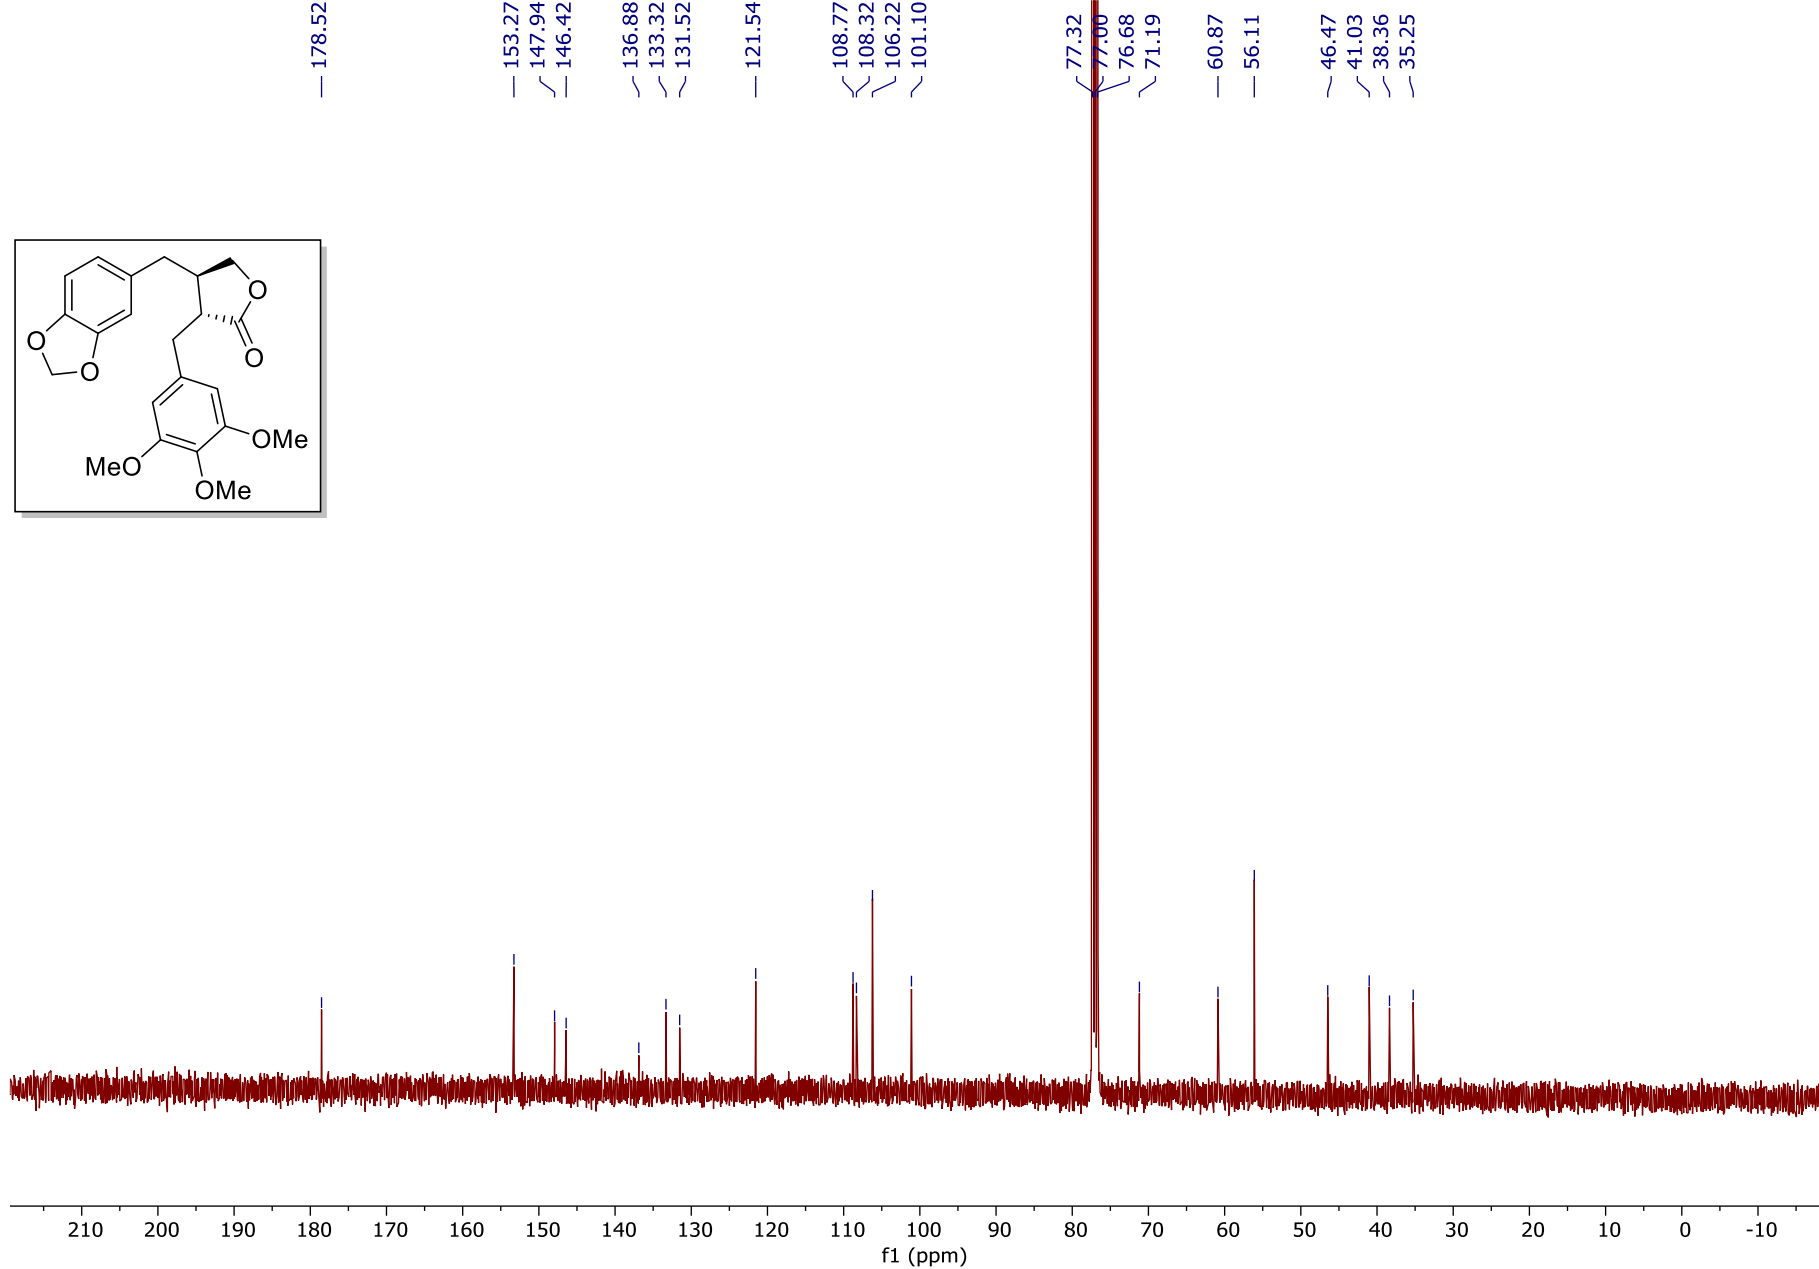

# <sup>1</sup>H NMR of (+)-Isostegane 4 (400 MHz, CDCl<sub>3</sub>)

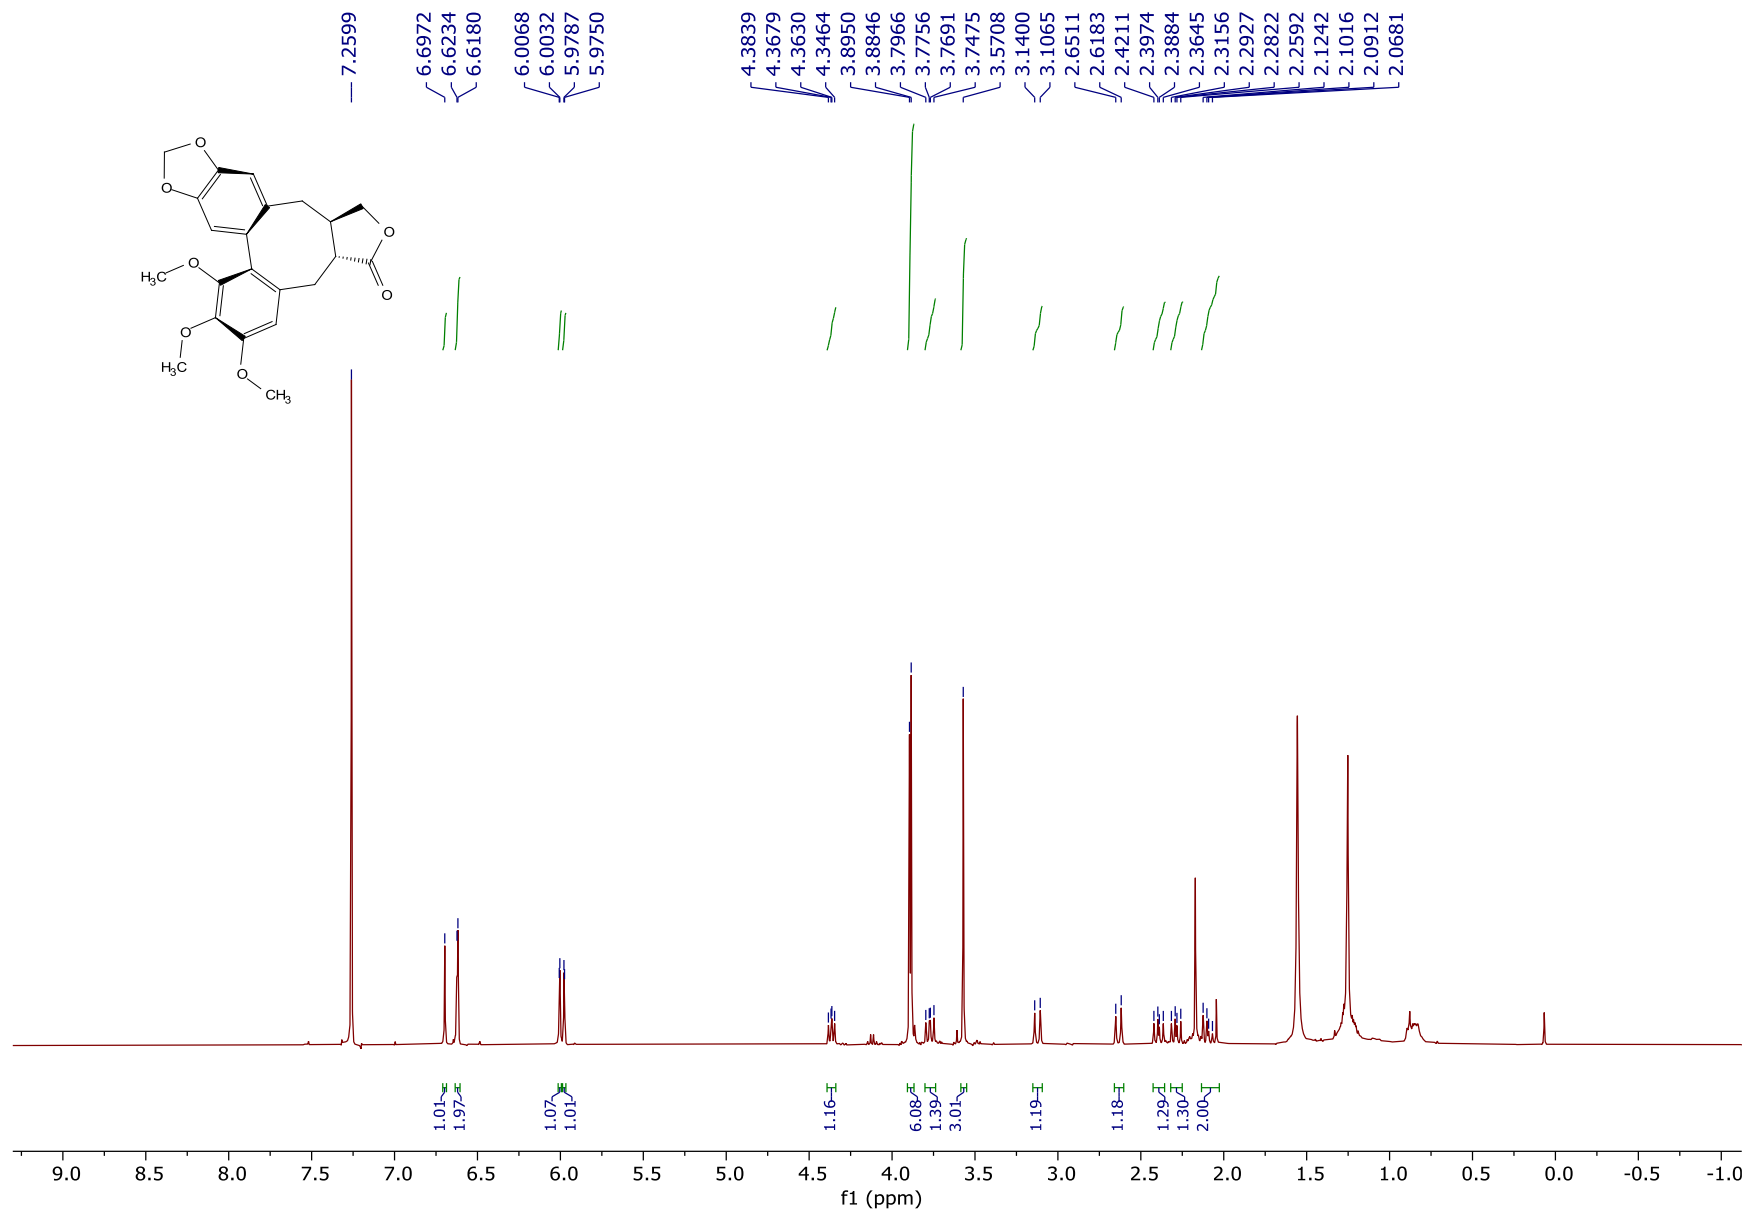

**<sup>13</sup>C NMR of (+)-Isostegane 4 (202 MHz, CDCl<sub>3</sub>)**

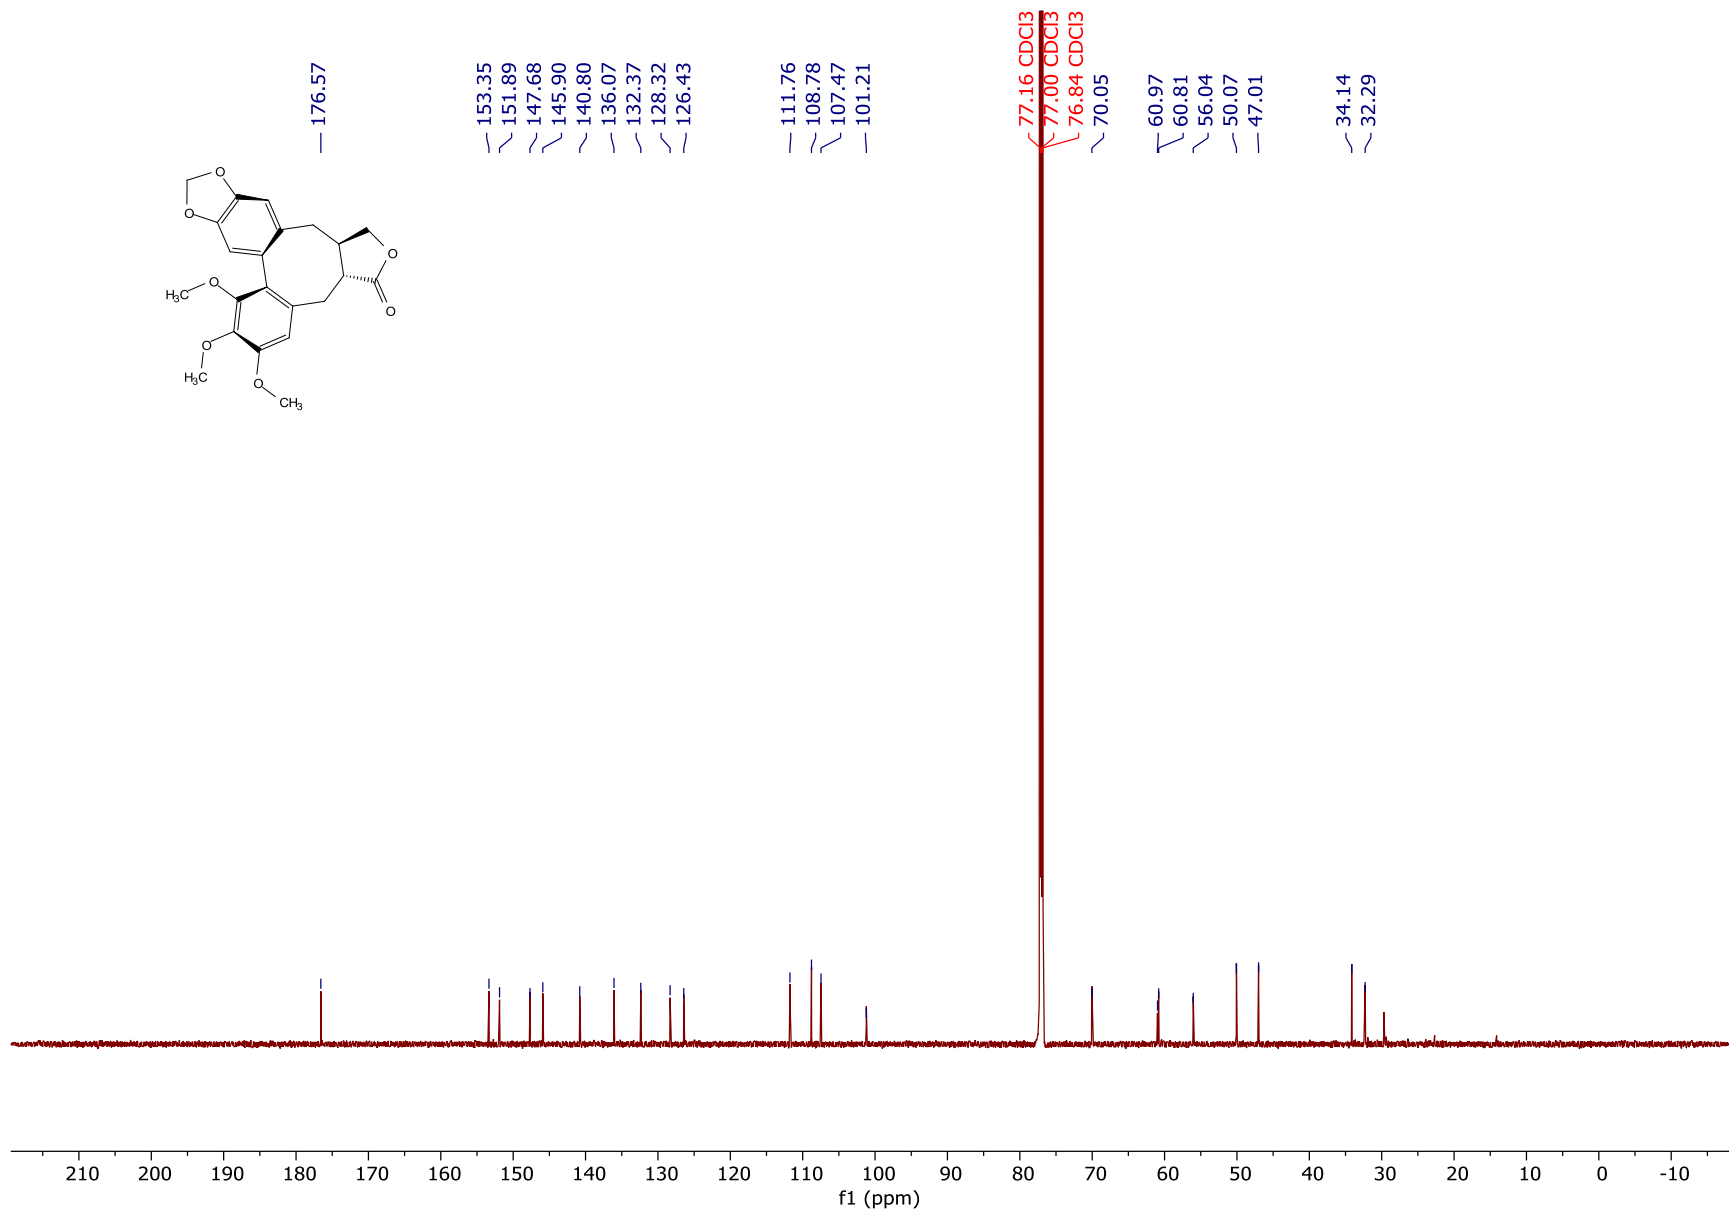



# <sup>1</sup>H NMR of (7'R)-Hydroxybrusehernin 9 (400 MHz, CDCl<sub>3</sub>)

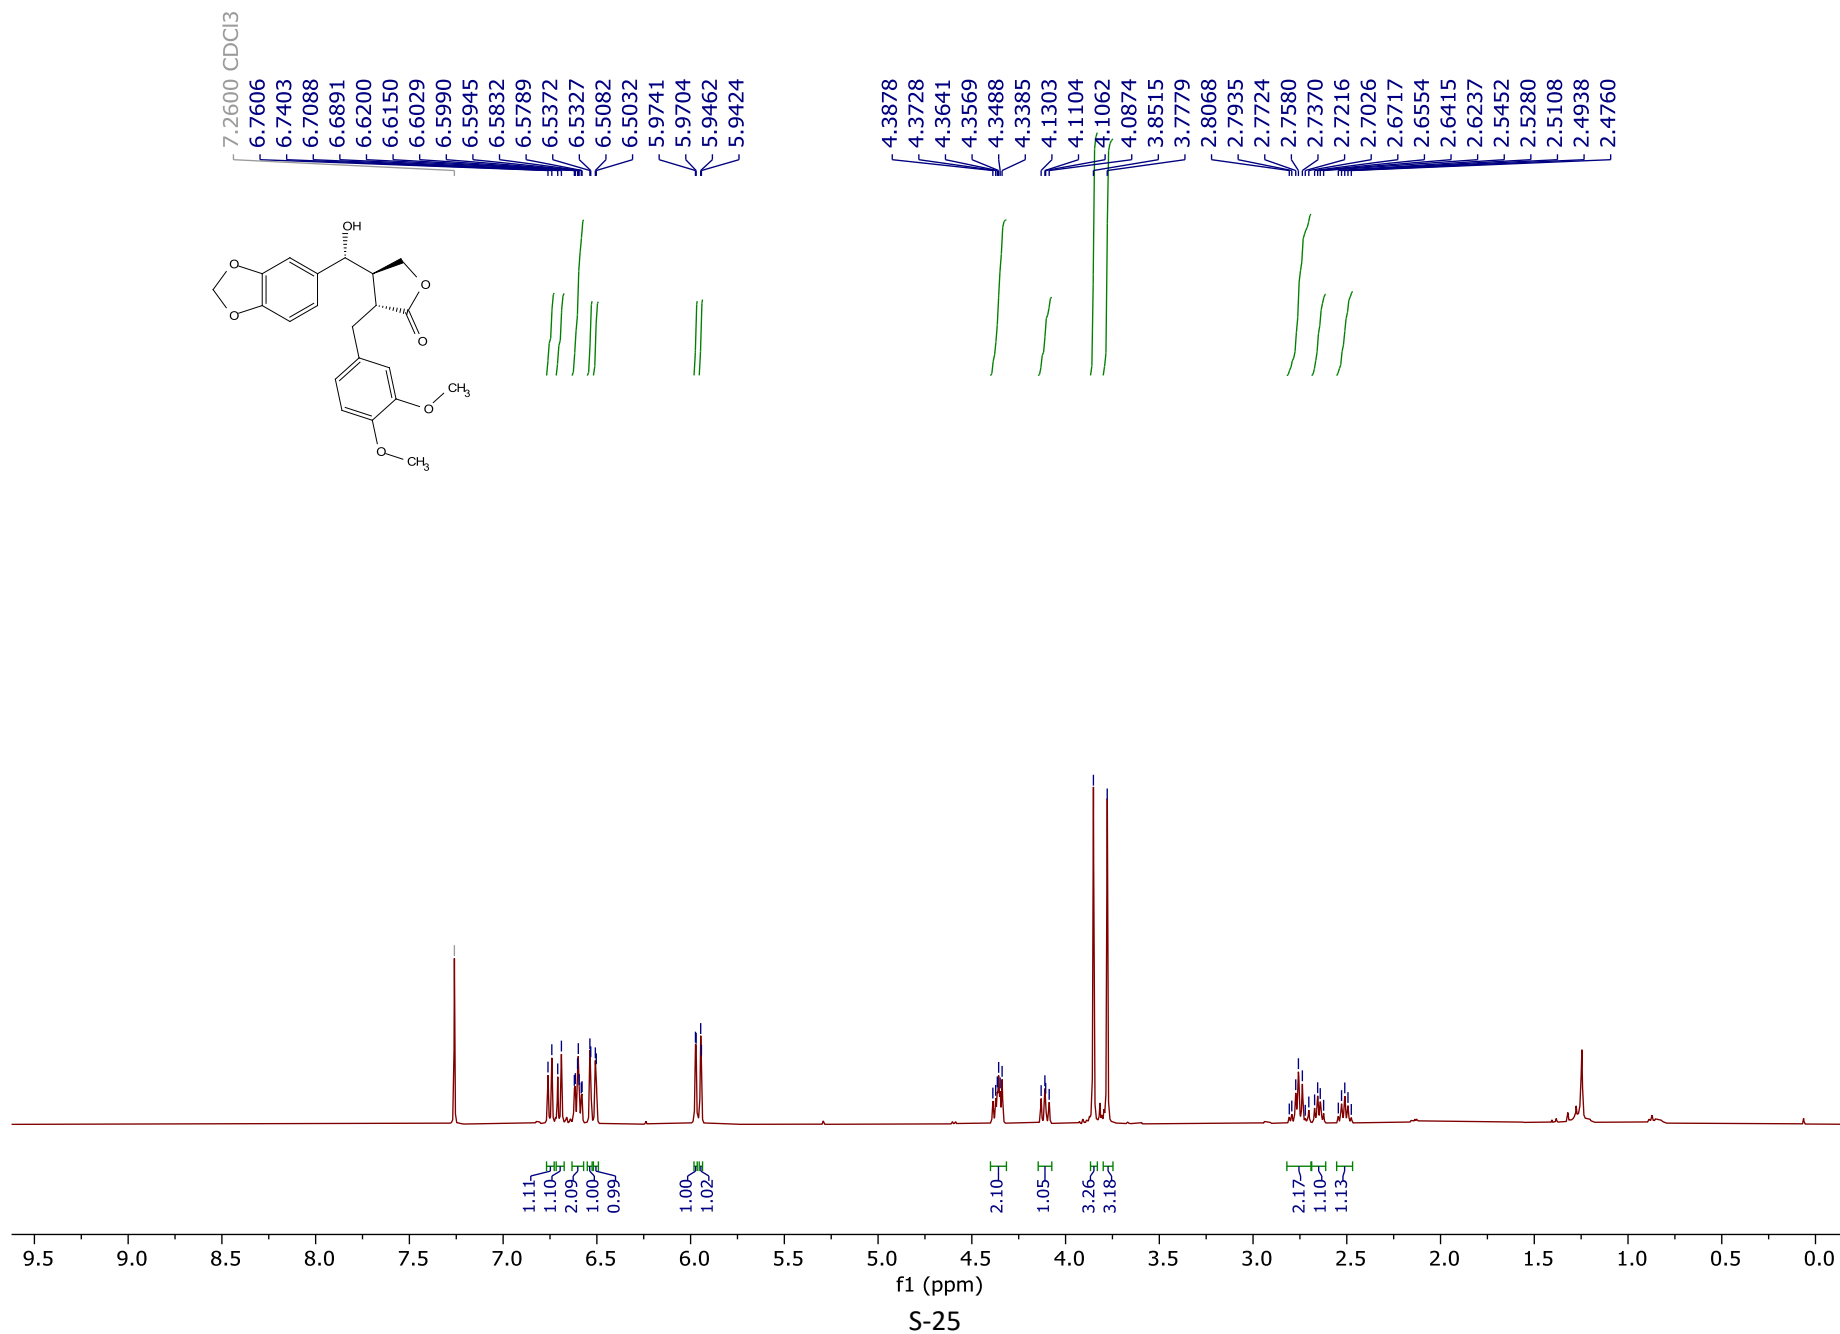

**<sup>13</sup>C NMR of (7'R)-Hydroxybrusehernin 9 (101 MHz, CDCl<sub>3</sub>)**

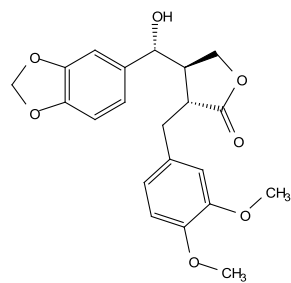

— 178.89

148.93  
148.09  
147.86  
147.50

— 135.40

— 129.88

121.31  
119.55

111.76  
110.88

107.87  
105.92

101.33

77.32  
77.00  
76.68  
73.96  
68.12

55.76  
55.62

46.05  
43.68

— 34.90

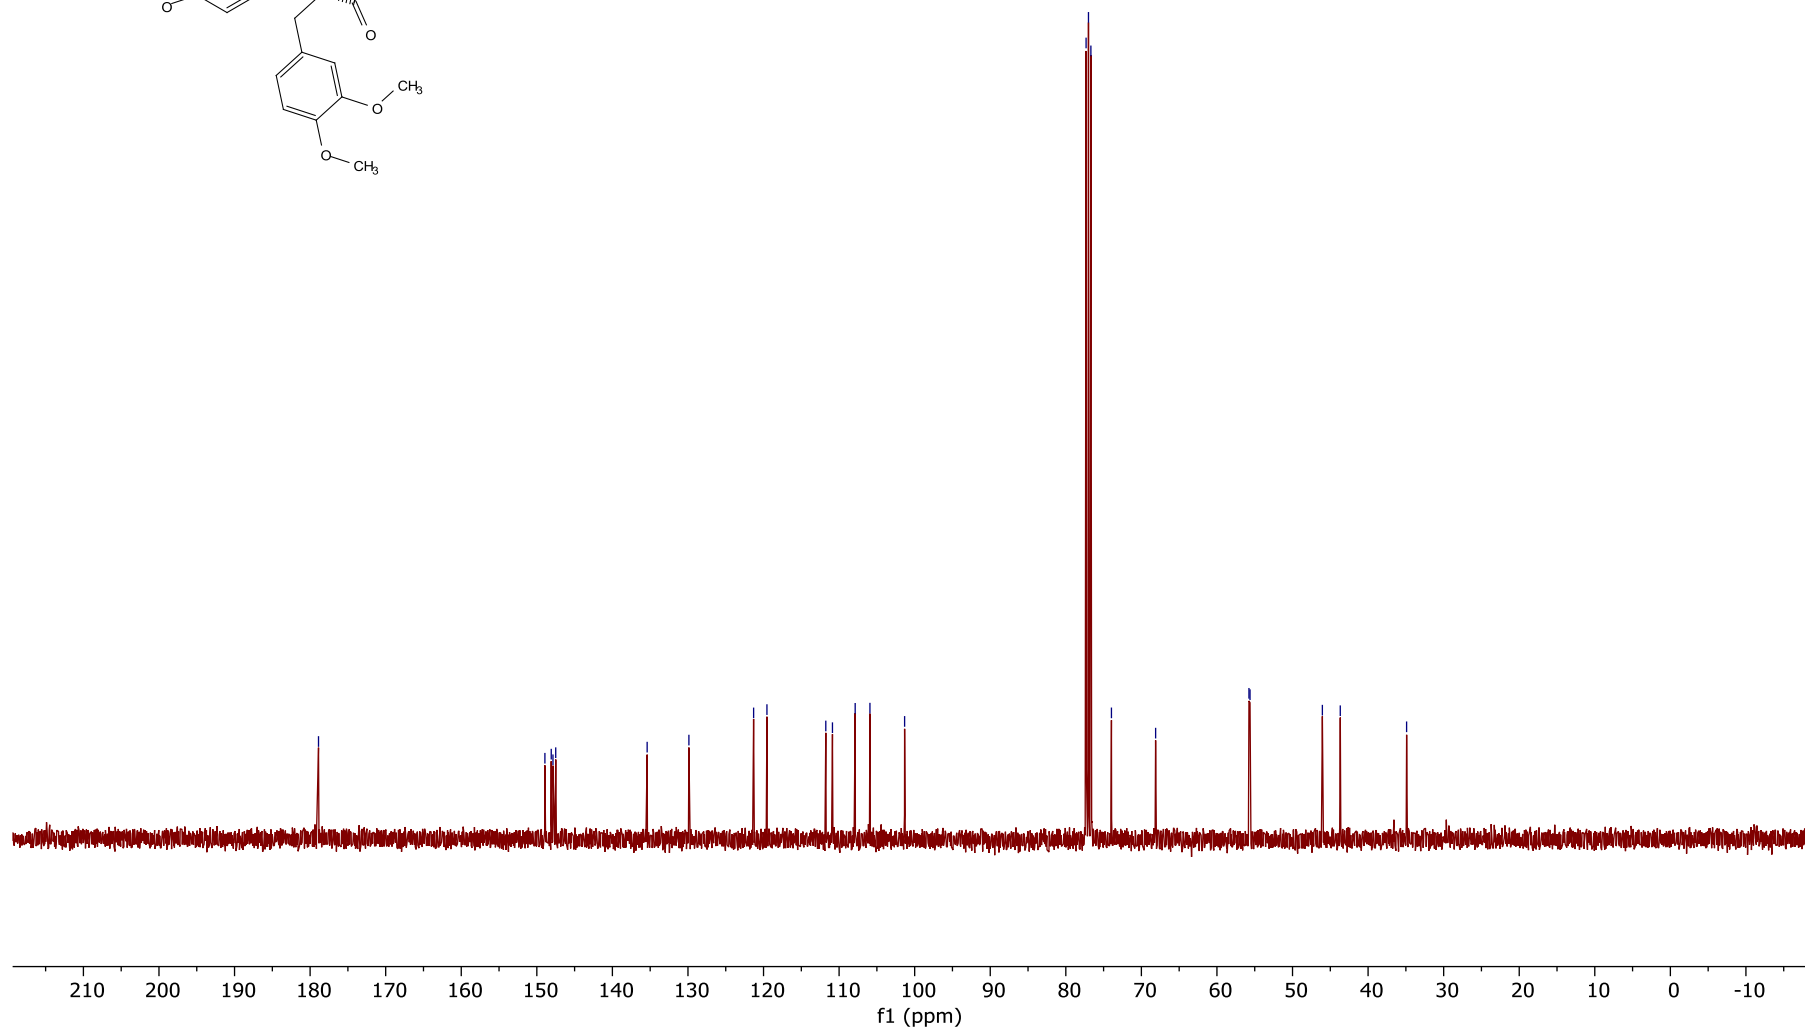

# <sup>1</sup>H NMR of (-)-Brusehernin 10 (400 MHz, CDCl<sub>3</sub>)

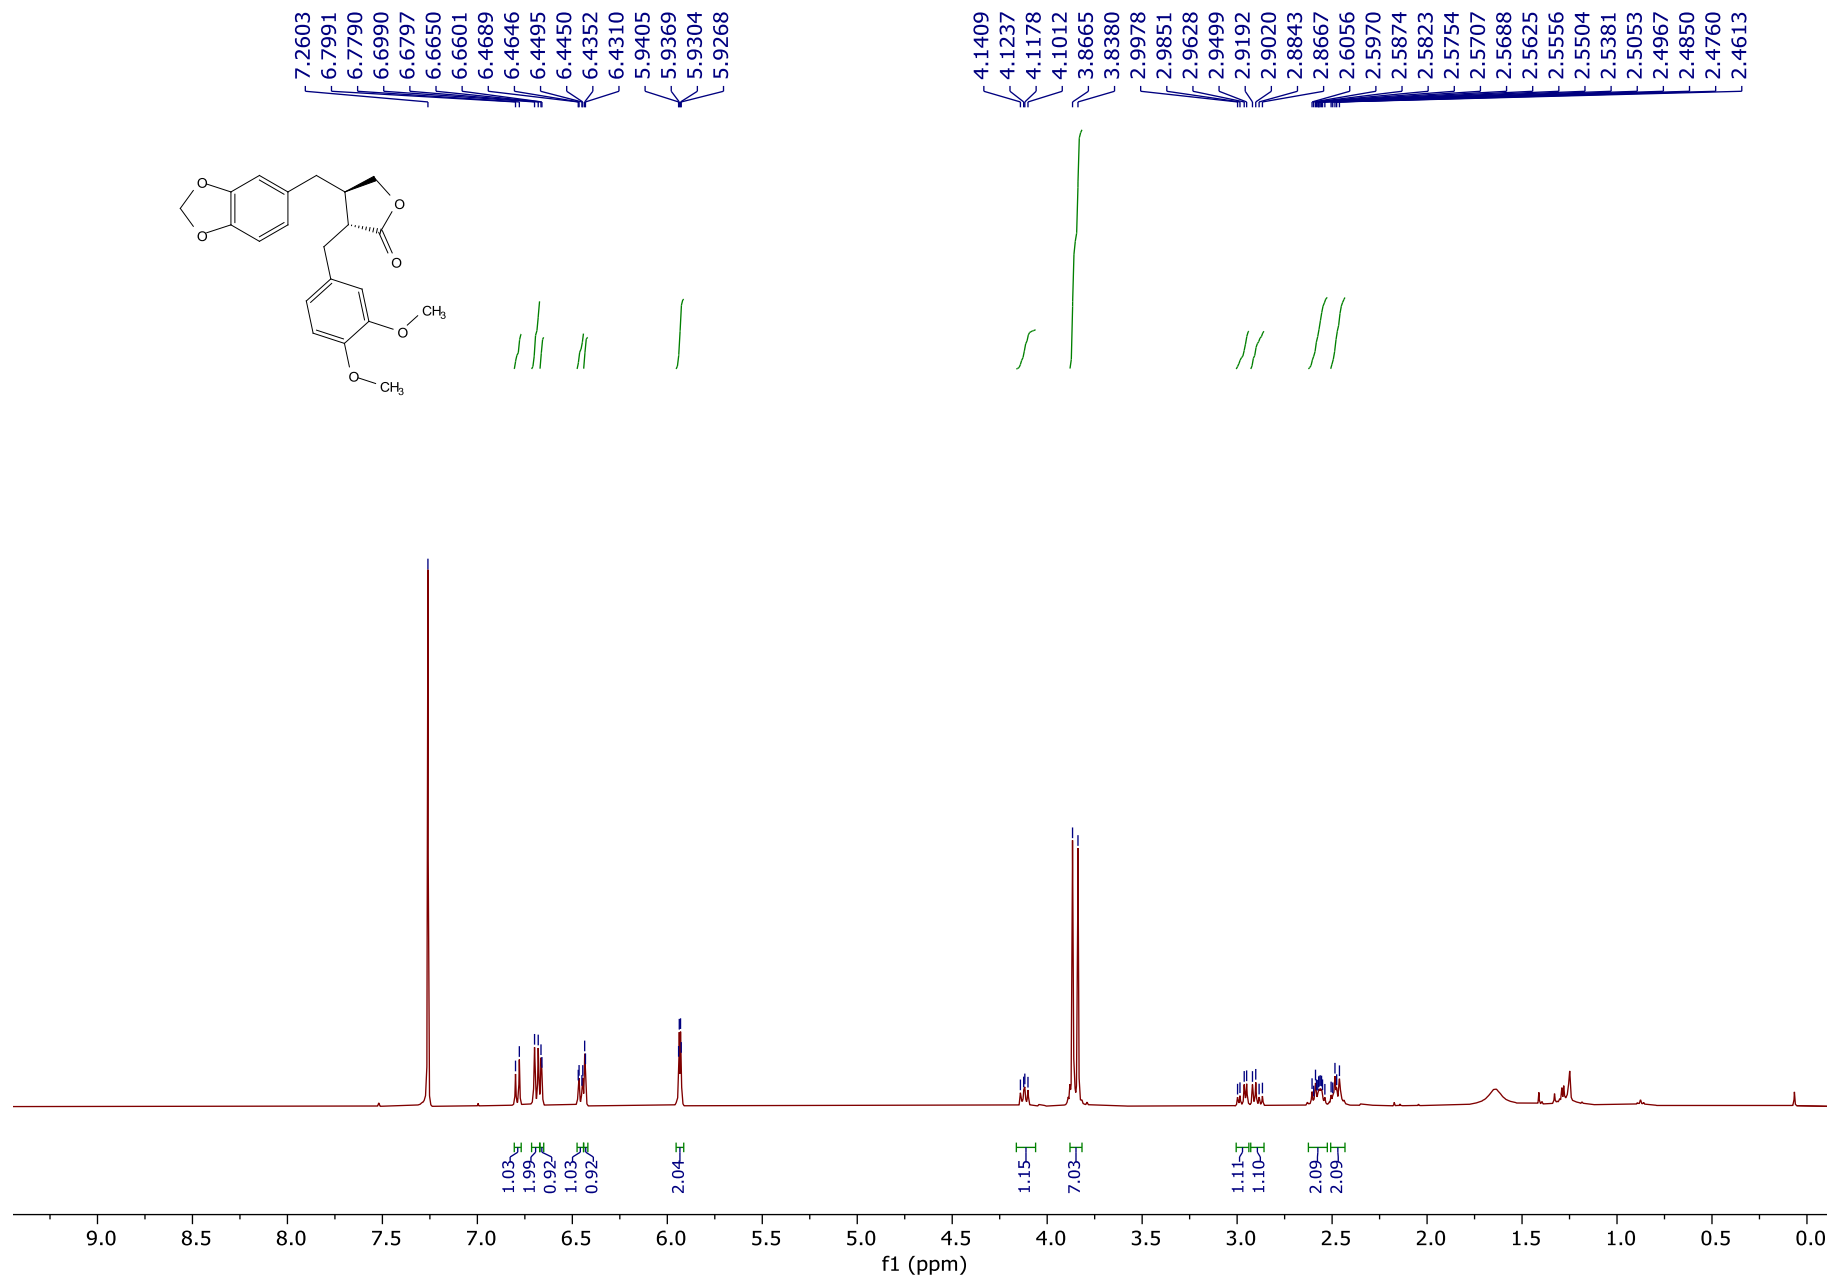

**<sup>13</sup>C NMR of (-)-Brusehernin 10 (101 MHz, CDCl<sub>3</sub>)**

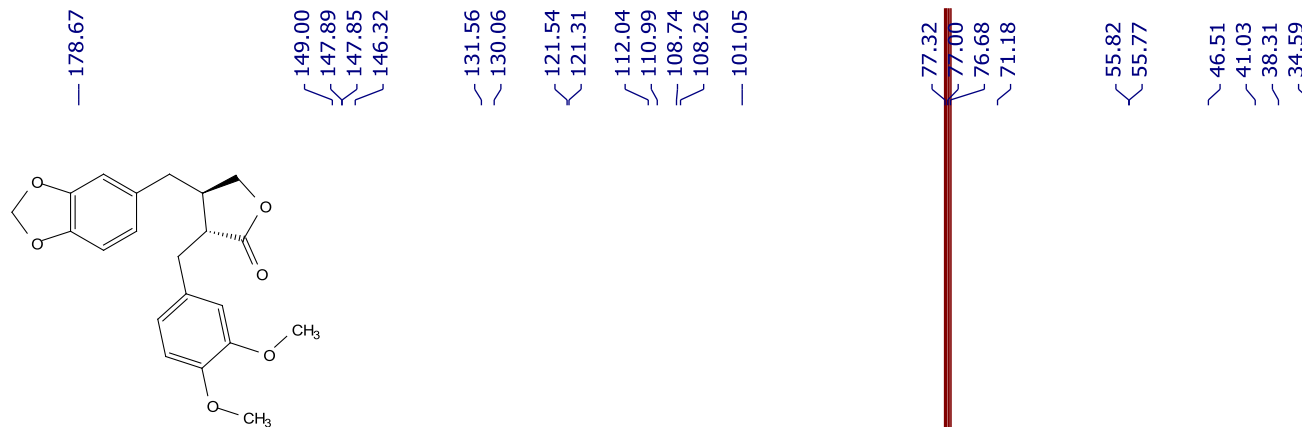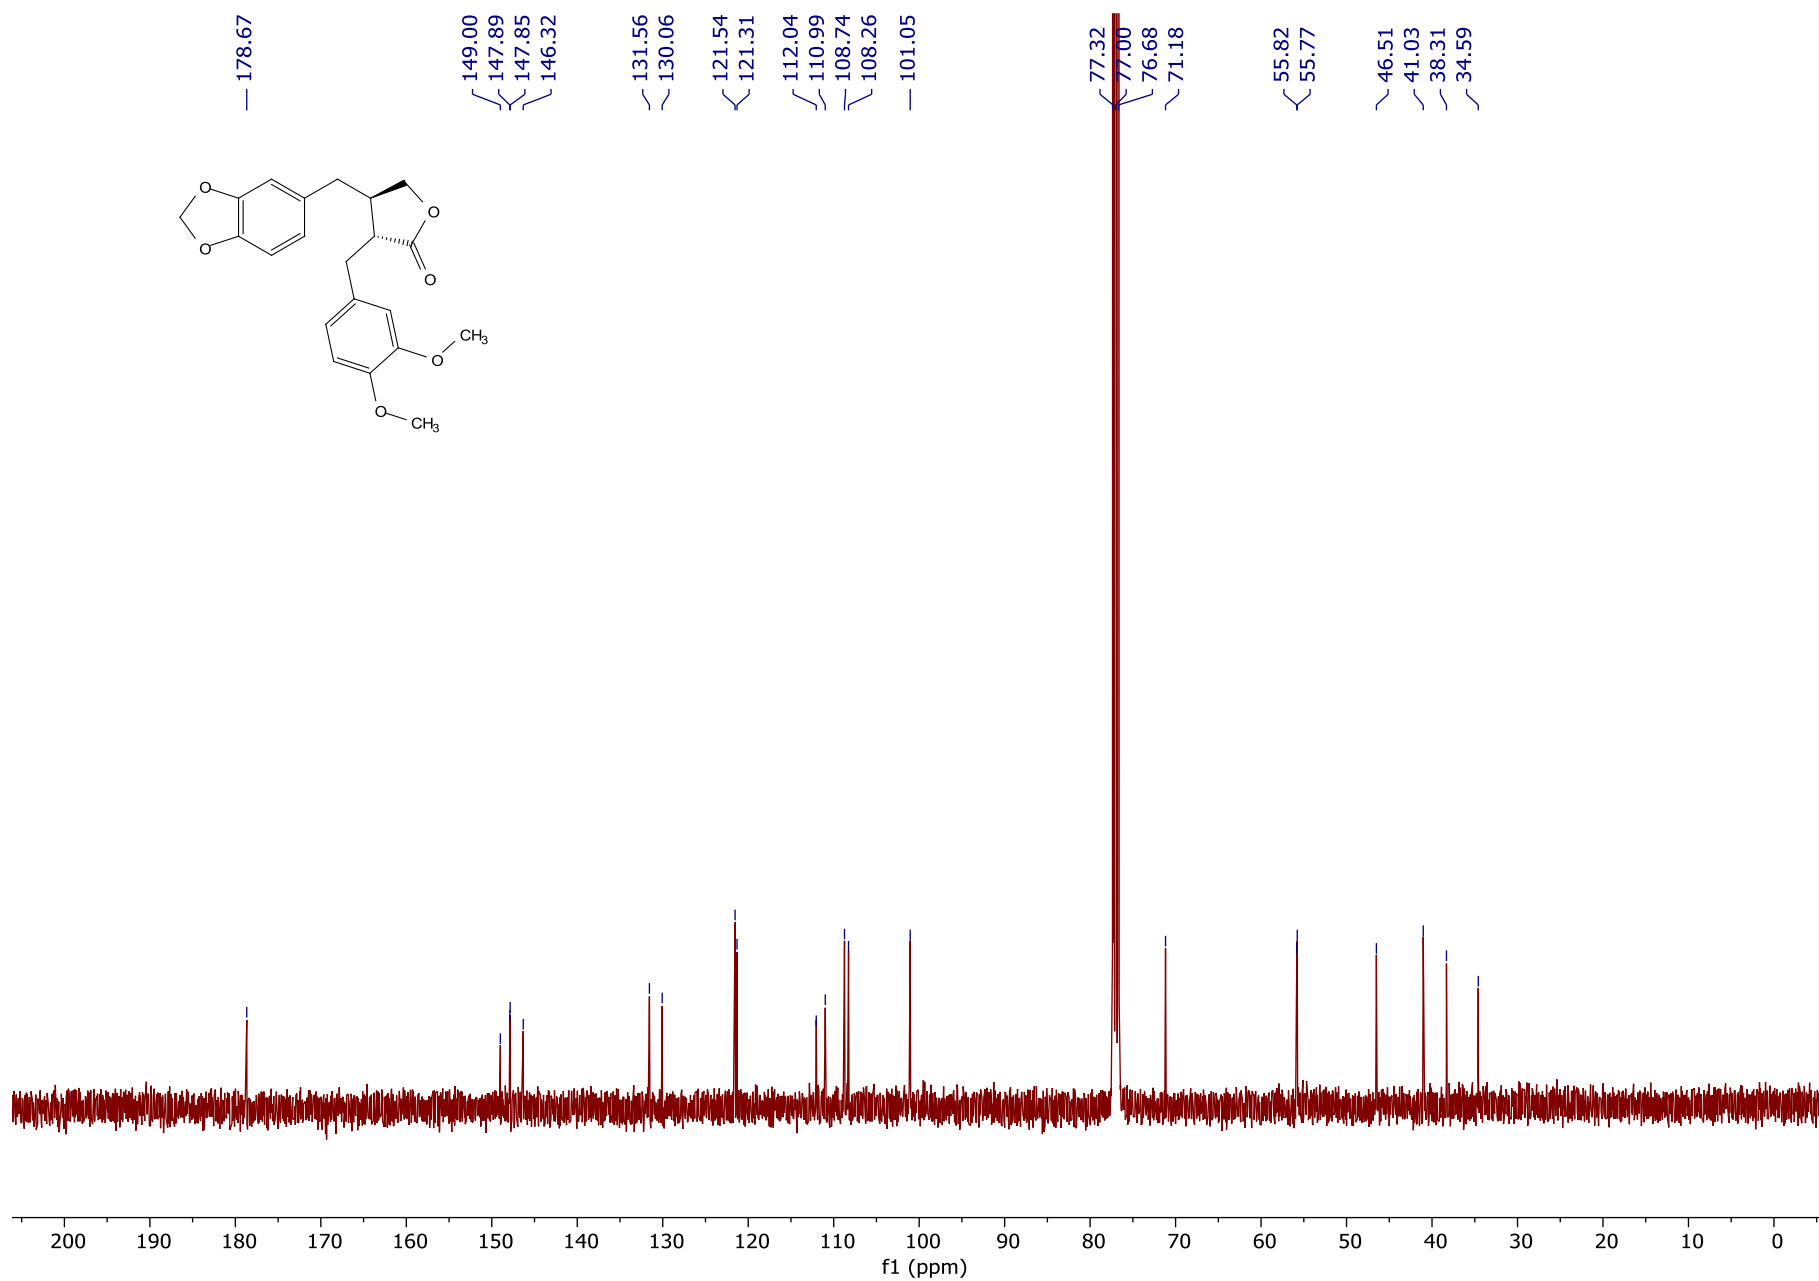

# <sup>1</sup>H NMR of (7'R)-Hydroxypluviatolide 11 (400 MHz, CDCl<sub>3</sub>)

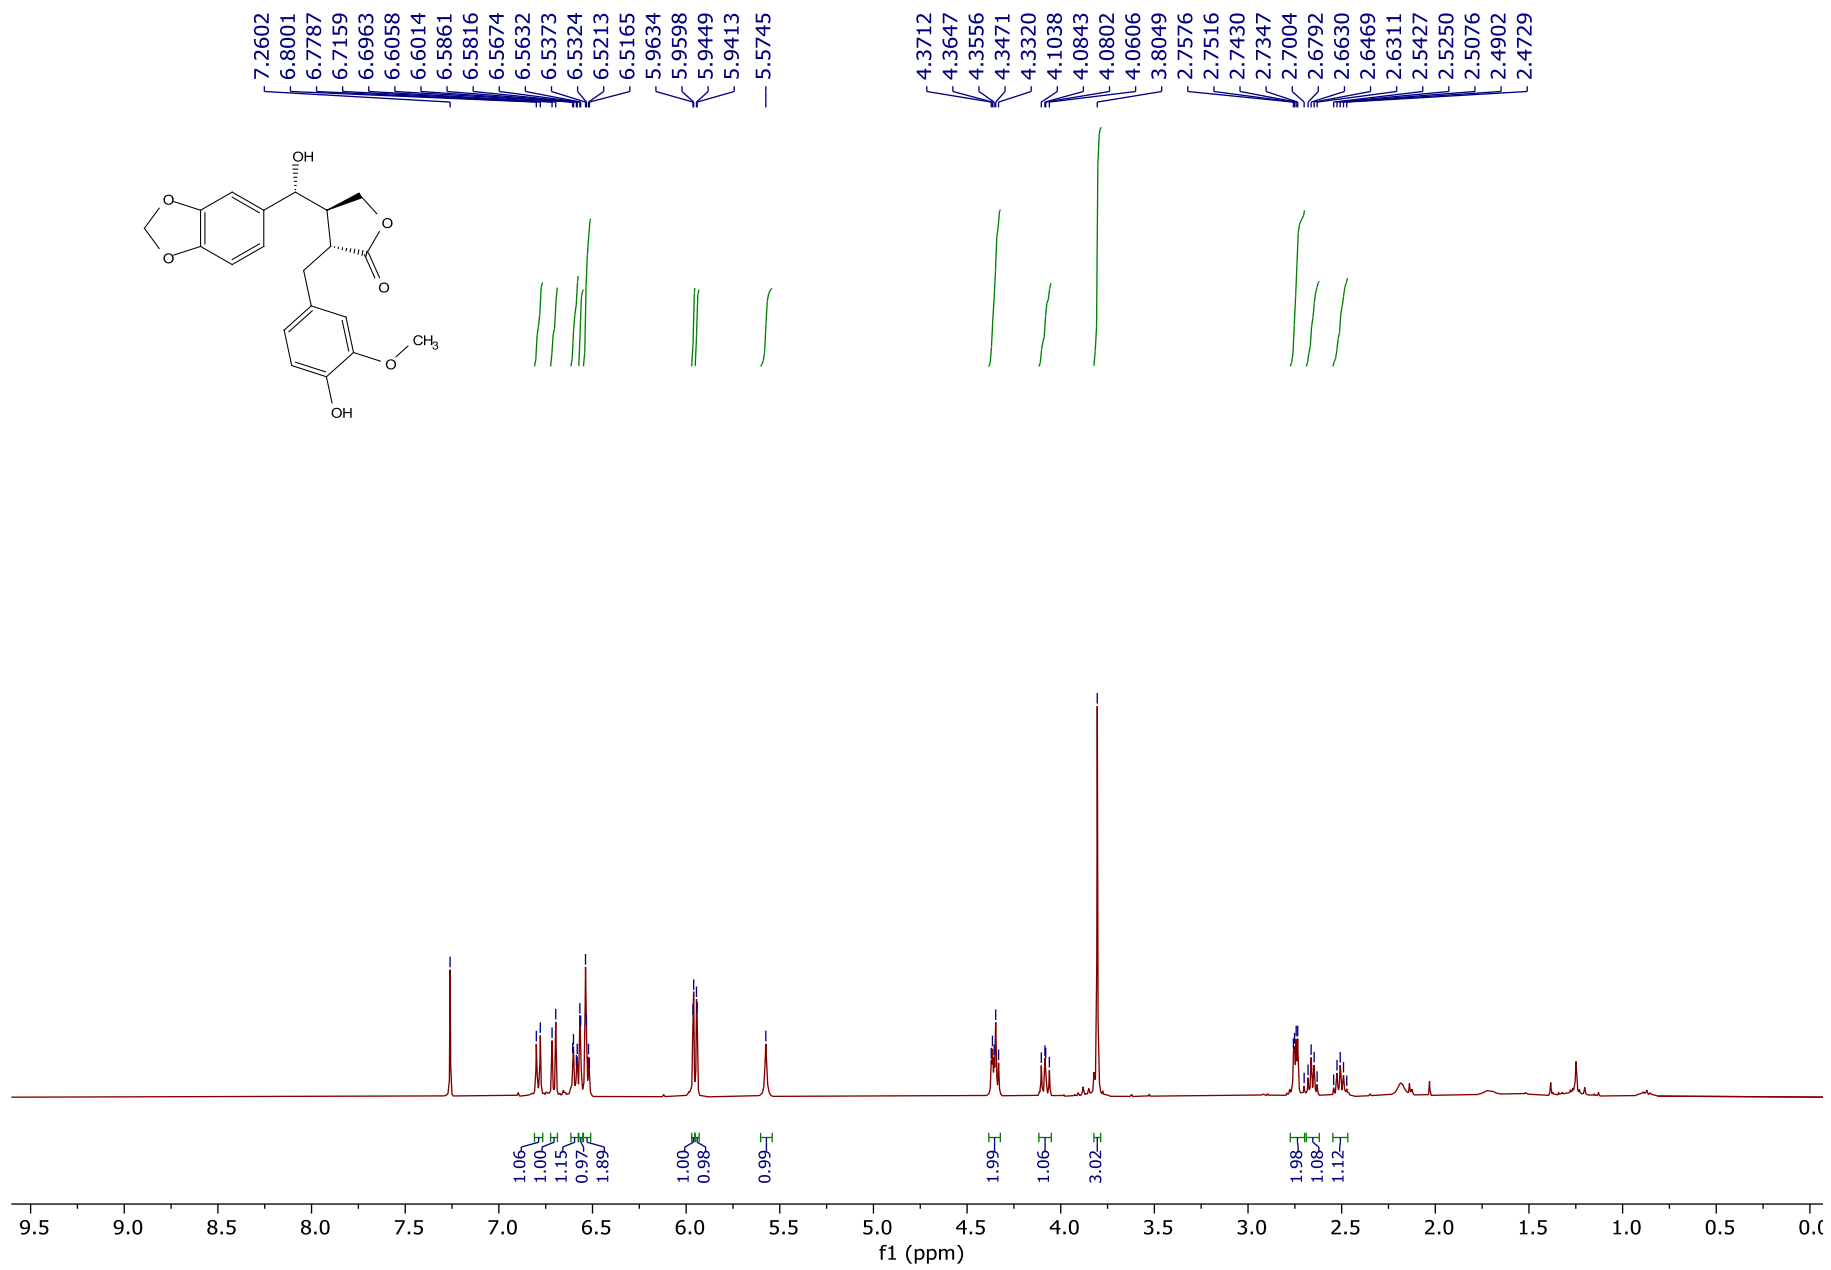

**<sup>13</sup>C NMR of 7'-(R)-Hydroxypluviatolide 11 (101 MHz, CDCl<sub>3</sub>)**

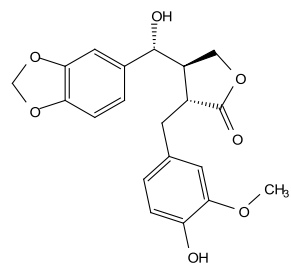

— 178.95

148.04

147.45

146.58

144.44

— 135.47

— 129.26

122.00

119.50

114.16

111.32

108.01

106.02

101.28

77.32

77.00

76.68

73.85

68.05

— 55.78

— 46.05

— 43.68

— 34.89

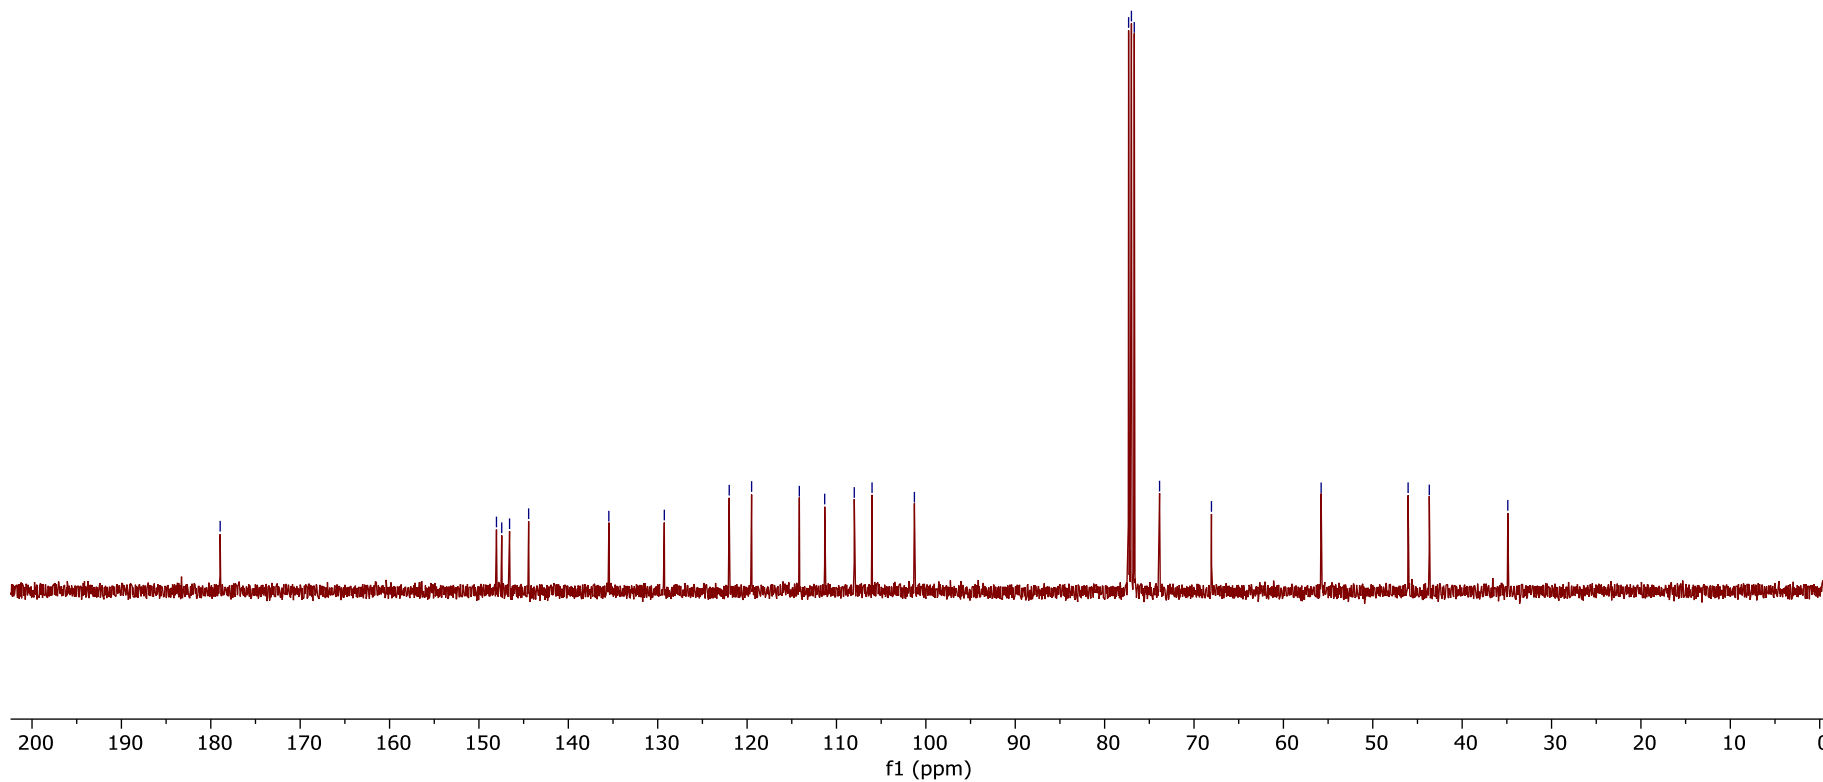

# <sup>1</sup>H NMR of (-)-Pluviatolide 12 (400 MHz, CDCl<sub>3</sub>)

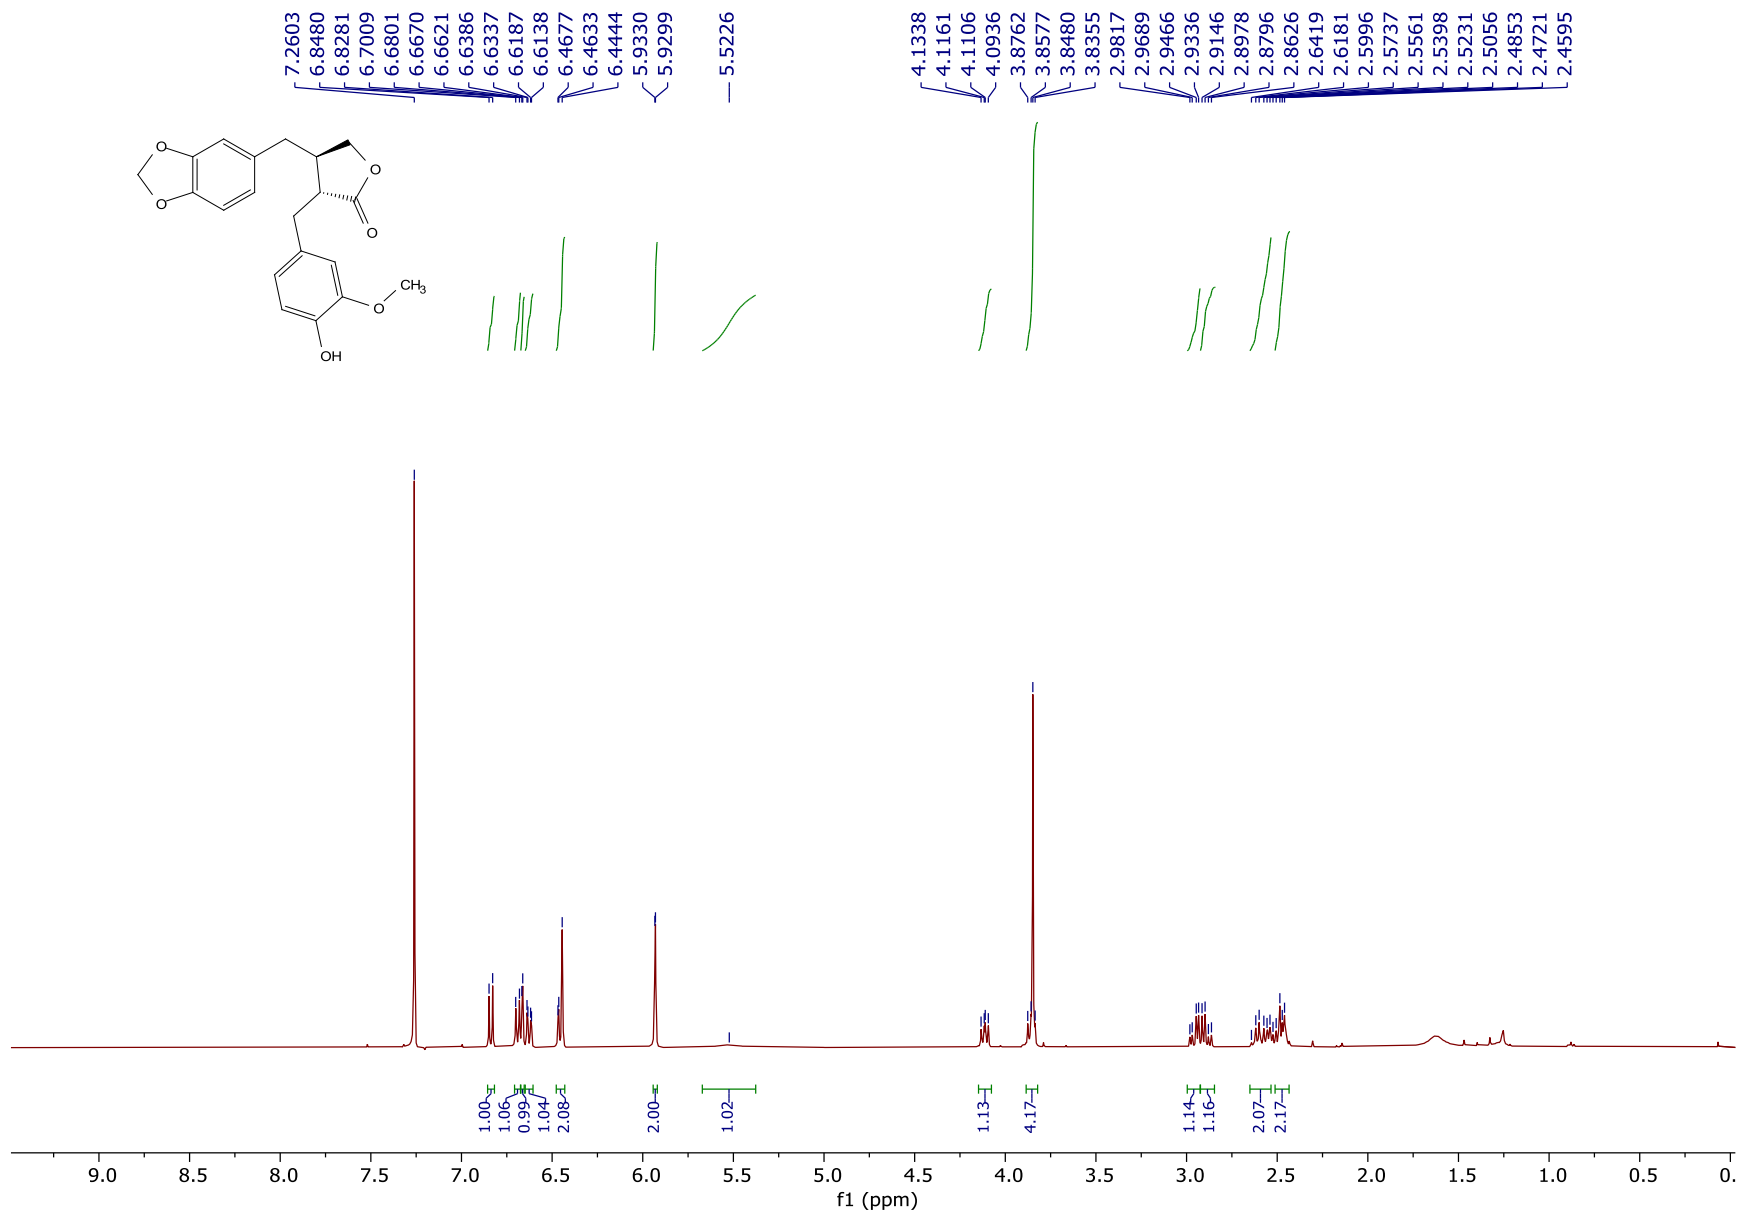

**<sup>13</sup>C NMR of (-)-Pluviatolide 12 (101 MHz, CDCl<sub>3</sub>)**

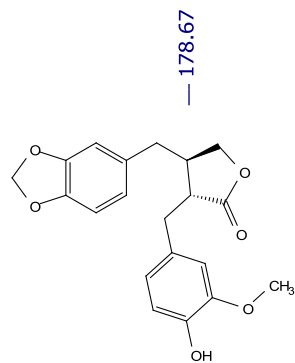

178.67

147.89  
146.69  
146.36  
144.56

131.62  
129.46

122.10  
121.57

114.26  
111.53

108.82  
108.33

101.06

77.34  
77.02  
76.71  
71.21

55.89

46.62  
41.02  
38.32  
34.64

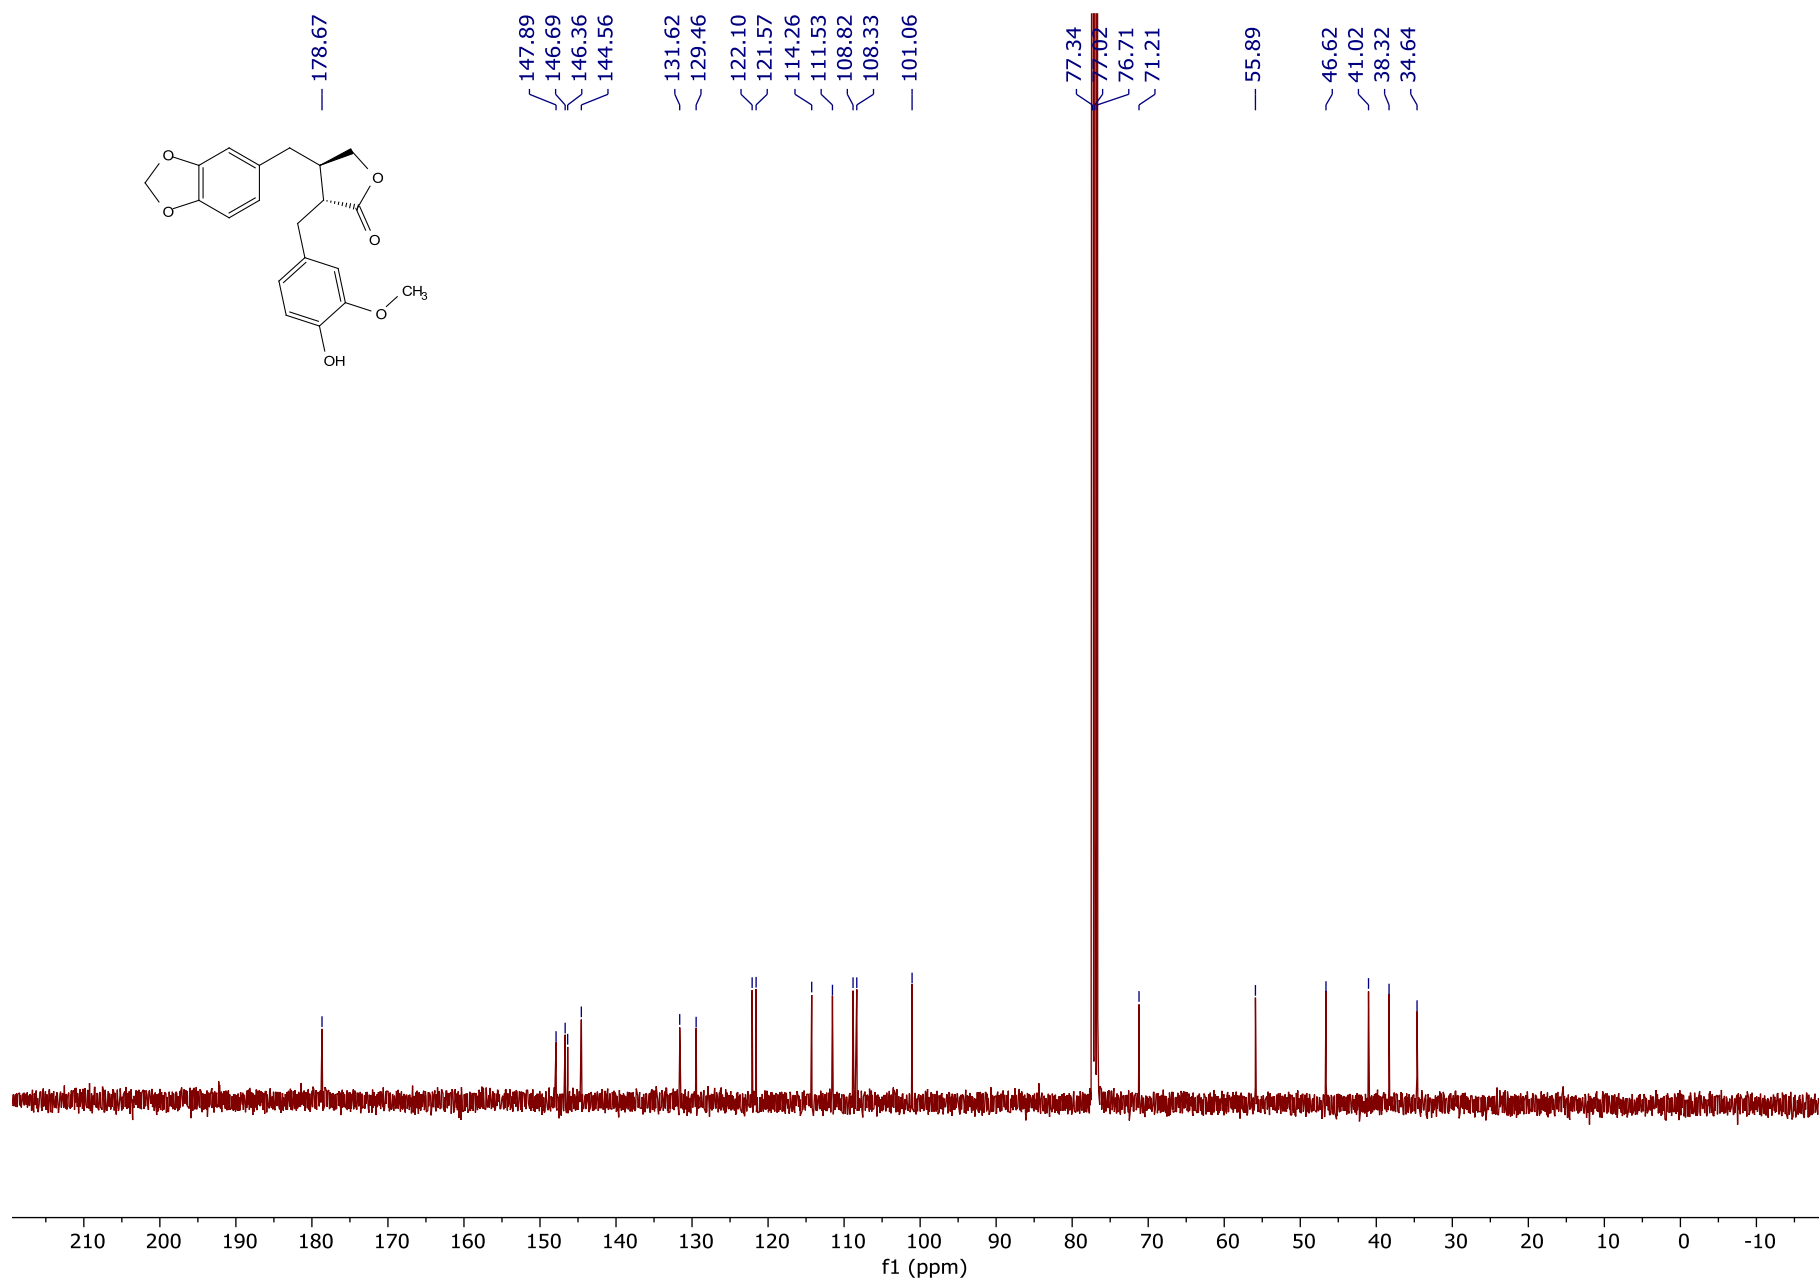

Supplement: d3ob01446k1.pdf [file d3ob01446k1.pdf]
